1 **Delta and theta neural entrainment during phonological and**  
2 **semantic processing in speech perception**

3 Guangting Mai <sup>a,b</sup>

4 William S-Y. Wang <sup>c,d</sup>

5 <sup>a</sup> Department of Experimental Psychology, University College London, UK

6 <sup>b</sup> Department of Medical Physics and Biomedical Engineering, University College London,  
7 UK

8 <sup>c</sup> Department of Chinese and Bilingual Studies, The Hong Kong Polytechnic University, Hong  
9 Kong SAR

10 <sup>d</sup> Language Engineering Laboratory, The Chinese University of Hong Kong, Hong Kong SAR

11

12 Correspondence: Guangting Mai, <[guangting.mai.15@ucl.ac.uk](mailto:guangting.mai.15@ucl.ac.uk)>

13 William S-Y. Wang, <[wsywang@polyu.edu.hk](mailto:wsywang@polyu.edu.hk)>

14

15

16

17

18

19

20

21

22

23

24

25

## 26 **Abstract**

27 Neural entrainment of acoustic envelopes is important for speech intelligibility in spoken  
28 language processing. However, it is unclear how it contributes to processing at different  
29 linguistic hierarchical levels. The present EEG study investigated this issue when participants  
30 responded to stimuli that dissociated phonological and semantic processing (real-word,  
31 pseudo-word and backward utterances). Multivariate Temporal Response Function (mTRF)  
32 model was adopted to map speech envelopes from multiple spectral bands onto EEG signals,  
33 providing a direct approach to measure neural entrainment. We tested the hypothesis that  
34 entrainment at delta (supra-syllabic) and theta (syllabic and sub-syllabic) bands take distinct  
35 roles at different hierarchical levels. Results showed that both types of entrainment involve  
36 speech-specific processing, but their underlying mechanisms were different. Theta-band  
37 entrainment was modulated by phonological but not semantic contents, reflecting the possible  
38 mechanism of tracking syllabic- and sub-syllabic patterns during phonological processing.  
39 Delta-band entrainment, on the other hand, was modulated by semantic information, indexing  
40 more attention-demanding, effortful phonological encoding when higher-level (semantic)  
41 information is deficient. Interestingly, we further demonstrated that the statistical capacity of  
42 mTRFs at the delta band and theta band to classify utterances is affected by their semantic  
43 (real-word vs. pseudo-word) and phonological (real-word and pseudo-word vs. backward)  
44 contents, respectively. Moreover, analyses on the response weighting of mTRFs showed that  
45 delta-band entrainment sustained across neural processing stages up to higher-order timescales  
46 (~ 300 ms), while theta-band entrainment occurred mainly at early, perceptual processing  
47 stages (< 160 ms). This indicates that, compared to theta-band entrainment, delta-band  
48 entrainment may reflect increased involvement of higher-order cognitive functions during  
49 interactions between phonological and semantic processing. As such, we conclude that neural  
50 entrainment is not only associated with speech intelligibility, but also with the hierarchy of  
51 linguistic (phonological and semantic) content. The present study thus provide a new insight  
52 into cognitive mechanisms of neural entrainment for spoken language processing.

53 **Keywords:** Delta- and theta-band neural entrainment, EEG, mTRF, speech envelopes,  
54 phonological processing, semantic processing

55

56 **Abbreviations:** EEG, electroencephalography; MEG, magnetoencephalography; TRF,  
57 temporal response function; mTRF, multivariate temporal response function; tACS,  
58 transcranial alternative current stimulation; SUS, semantically unpredictable sentences; AM,  
59 amplitude-modulated

60

61

62

63

## 64 **Highlights**

- 65 • Low-frequency neural entrainment was examined via mTRF models in EEG during  
66 phonological and semantic processing.
- 67 • Delta entrainment take roles in effortful listening for phonological recognition
- 68 • Theta entrainment take roles in tracking syllabic and subsyllabic patterns for  
69 phonological processing
- 70 • Delta and theta entrainment sustain at different timescales of neural processing

71

## 72 **1. Introduction**

73 Research into how speech acoustic properties are processed by the human brain is key to  
74 understanding neural mechanisms of speech and language perception. An important topic that  
75 recent research has focused on is to examine how speech temporal modulations are tracked and  
76 encoded through brain oscillatory activity (i.e., neural entrainment; see reviews: [Giraud and](#)  
77 [Poepfel, 2012](#); [Ding and Simon, 2014](#)). This is because low-frequency envelope modulations  
78 (typically < 10 Hz) are critical acoustic contributors to human speech recognition ([Drullman et](#)  
79 [al., 1994](#); [Shannon et al., 1995](#); [Arai et al., 1999](#); [Swaminathan and Heinz, 2012](#)). Neural  
80 entrainment of low-frequency envelopes has been suggested to serve as one of the neural  
81 mechanisms of sustaining speech comprehension ([Ahissar et al., 2001](#); [Ding and Simon, 2014](#)).

82 Recent neurophysiological studies using magnetoencephalography (MEG) and  
83 electroencephalography (EEG) have shown that entrainment of low-frequency neural  
84 oscillations to speech envelopes at the corresponding modulation rates is associated with  
85 speech intelligibility (MEG: [Peelle et al., 2013](#); [Doelling et al., 2014](#); EEG: [Vanthornhout et](#)  
86 [al., 2018](#)). Specifically, [Peelle et al. \(2013\)](#) manipulated speech intelligibility by changing the  
87 spectral resolution (i.e., number of frequency bands) of noise-vocoded sentences. They found  
88 that phase coherence between MEG and acoustic envelopes at 4 ~ 7 Hz was statistically greater  
89 during participants listening to 16-band (intelligible) than single-band (unintelligible) noise-  
90 vocoded sentences. In the study by [Doelling et al. \(2014\)](#), acoustic envelopes at 2 ~ 9 Hz of  
91 noise-vocoded sentences were artificially removed in various spectral bands. As a result, MEG-  
92 envelope entrainment at the corresponding rates was found to be decreased accompanied by  
93 reductions in speech intelligibility. [Vanthornhout et al. \(2018\)](#) used a neural reconstruction  
94 method that decodes the acoustic envelopes from EEG responses ([Crosse et al., 2016](#)) during  
95 participants recognizing speech in noisy environments. They found that the reconstruction  
96 accuracy of envelopes at 0.5 ~ 8 Hz, which reflects the degree of neural-envelope entrainment,  
97 was significantly correlated with the speech recognition performance. Moreover, association  
98 between neural entrainment and speech perception may be causally controlled by a higher-  
99 order cognitive neural network. For example, [Park et al. \(2015\)](#) used causal connectivity  
100 analysis in MEG showing that neural entrainment of envelopes at 1 ~ 7 Hz in intelligible  
101 (unprocessed), but not unintelligible (backward), speech, was associated with a top-down  
102 process occurring between left frontal and auditory cortices.

103 There have also been studies using brain stimulation, such as transcranial alternative current  
104 stimulation (tACS) that manipulated the degree of neural entrainment in order to study the

105 causal relationship between the entrainment and speech intelligibility (Zoefel et al., 2018;  
106 Riecke et al., 2018; Wilsch et al., 2018). Zoefel et al. (2018) used tACS to manipulate phase  
107 lags between neural oscillations and the acoustic rhythm at the sentence syllable rate (~ 3 Hz).  
108 They showed that the manipulation on intelligible vocoded sentences can modulate  
109 haemodynamic responses in the superior temporal gyrus, while such findings were absent for  
110 unintelligible vocoded sentences. Riecke et al. (2018) and Wilsch et al. (2018) used similar  
111 paradigms to manipulate the neural-envelope phase lags as in Zoefel et al. (2018) (at syllable  
112 rate of 4 Hz in Riecke et al. (2018) and at the envelope rate < 10 Hz in Wilsch et al. (2018))  
113 and found that tACS can causally modulate speech intelligibility in noisy environments.

114 Results of the above-mentioned studies (Peelle et al., 2013; Doelling et al., 2014; Park et  
115 al. 2015; Zoefel et al., 2018; Riecke et al., 2018; Wilsch et al., 2018; Vanthornhout et al., 2018)  
116 showed the importance of neural entrainment at the low frequencies, including delta (< 4 Hz)  
117 and theta (4 ~ 8 Hz) bands. It has been argued that entrainment at these two bands may involve  
118 different functional mechanisms (Ding and Simon, 2014). Theta-band entrainment is argued to  
119 reflect processing syllabic- and sub-syllabic-level features (Giraud and Poeppel, 2012) and it  
120 was found to covary with speech intelligibility (increased theta-band entrainment  
121 corresponding to better speech intelligibility) (Peelle et al., 2013; Ding et al., 2014). Delta-  
122 band entrainment, on the other hand, is argued to reflect processing supra-syllabic patterns such  
123 as prosodic information (Bourguignon et al., 2013; Ghitza, 2017). In contrast to theta-band  
124 entrainment, increased delta-band entrainment was found in some attention-demanding speech  
125 recognition conditions (i.e., with decreased speech intelligibility), such as recognition of speech  
126 with reduced spectral resolution (Ding et al., 2014) or with increasingly noisy backgrounds  
127 (Vander Ghinst et al., 2016). Using MEG, Molinaro and Lizarazu (2018) recently showed that  
128 delta-band, but not theta-band, entrainment is greater during processing speech than non-  
129 speech signals in the right superior temporal and left inferior frontal regions, arguing that delta-  
130 band entrainment involves higher-order computations while theta-band entrainment is  
131 responsible for lower-level, perceptual auditory perception.

132 In spite of the abundant findings on the roles of neural entrainment of speech envelopes as  
133 well as distinctions between delta- and theta-band entrainment, there are still gaps with respect  
134 to linguistic and methodological concerns within these findings. First, speech intelligibility  
135 includes understanding of linguistic information at different hierarchical levels (e.g.,  
136 phonology and semantics; Nahum et al., 2008). Simply seen from the relationship between  
137 neural entrainment and speech intelligibility, some critical questions still remain unanswered,  
138 e.g.: (i) What linguistic hierarchical levels are involved during the interaction between neural  
139 entrainment and speech perception? (ii) What is the role of neural entrainment and how would  
140 it subserve speech intelligibility at different hierarchical levels respectively? Second, most  
141 MEG/EEG studies reviewed above (Peelle et al., 2013; Doelling et al., 2014; Park et al. 2015;  
142 Vander Ghinst et al., 2016; Molinaro and Lizarazu, 2018; Vanthornhout et al., 2018) reported  
143 the effects of neural entrainment to single broadband acoustic envelopes. While intelligibility  
144 is achieved via human extracting acoustic components (including low-frequency envelopes)  
145 from multiple spectral bands at the cochlear output, speech with only broadband envelopes is  
146 barely intelligible (e.g., Shannon et al., 1995; Xu et al., 2005). Although speech envelopes in  
147 different spectral bands can be highly correlated with each other, such correlations reduce  
148 significantly with increased spectral distance between bands (Crouzet and Ainsworth, 2001).  
149 By applying a linear transformation algorithm on EEGs in response to speech, Di Liberto et al.

150 (2015) provided evidence that neural encoding of envelopes from multiple spectral bands is  
151 greater than encoding of broadband envelopes. Therefore, it is important to consider that  
152 encoding multi-narrowband, rather than broadband, envelopes, could be a more appropriate  
153 form of neural entrainment. Third, although phase coherence between neural responses and  
154 acoustic envelopes (Peelle et al., 2013; Doelling et al., 2014; Vander Ghinst et al., 2016;  
155 Vanthornhout et al., 2018) provide insights into how speech acoustic features are processed, it  
156 does not characterize response functions of the brain and thus is an indirect measure of neural  
157 entrainment (Crosse et al., 2016).

158 By addressing these concerns from previous studies, the present study aims at  
159 characterizing the distinctions between delta- and theta-band neural entrainment at different  
160 linguistic hierarchical levels during speech perception. The present study is based on  
161 experiments and data of our previous paper which investigated the EEG oscillatory indices for  
162 different levels of auditory sentence processing (Mai et al., 2016). We used three types of  
163 continuous Mandarin utterances in order to dissociate the levels of phonology and semantics:  
164 (1) sentences consisting of meaningful disyllabic words assembled with a valid syntactic  
165 structure ('real-word'); (2) utterances with morphologically valid syllables, but no valid  
166 disyllabic words ('pseudo-word'); and (3) backward (time-reversed) versions of the real-word  
167 and pseudo-word utterances (for detailed descriptions, see *Stimuli and tasks* and Mai et al.,  
168 2016). Participants completed a sound-matching task when they heard an utterance in each trial  
169 and scalp-EEGs were recorded simultaneously. The types of stimuli resembled those used in  
170 previous functional imaging studies that tested the neural processing at different hierarchical  
171 levels in speech (Binder et al., 2000; Londei et al., 2010; Saur et al., 2010). Real-word and  
172 pseudo-word utterances can be distinguished by their differences in semantic contents, whilst  
173 pseudo-word and backward utterances can be distinguished by their differences in phonological  
174 contents<sup>1</sup>. The backward utterances were used as baselines because they are closely matched  
175 in terms of acoustic complexity to the original utterances whilst distorted phonological  
176 information (Binder et al., 2000; Londei et al., 2010; Saur et al., 2010; Gross et al., 2013). In  
177 Mai et al. (2016), we showed that several EEG signatures (band power, neural entrainment of  
178 speech envelopes, cross-frequency coupling and inter-electrode coherence) at a wide range of  
179 frequencies (delta, theta, beta and gamma) can separately index phonological and higher-level  
180 (semantic) processing. Particularly, we showed the different roles delta- and theta-band neural  
181 entrainment, where the theta-band entrainment indexes greater phonological processing for  
182 speech (real-word and pseudo-word) than for non-speech (backward) while delta-band  
183 entrainment indexes greater effortful phonological recognition for pseudo-word utterances.  
184 However, similar to previous studies (e.g., Peelle et al., 2013; Doelling et al., 2014; Vander  
185 Ghinst et al., 2016), phase coherence between EEGs and the speech broadband envelopes, an  
186 indirect measure of neural entrainment, was calculated. In the present study, neural entrainment  
187 was quantified using a linear transformation algorithm via multivariate Temporal Response  
188 Functions (mTRF) (Di Liberto et al. 2015; Crosse et al., 2016). Such approach characterizes  
189 the brain's response function that maps acoustic features onto neural responses, providing a  
190 more direct measure of neural entrainment. It can also reflect EEG encoding of multi-  
191 narrowband envelopes (see details in Crosse et al., 2016, and *Methods*), outweighing measures

---

<sup>1</sup> Although in Mandarin, a morphological valid syllable could convey certain semantic information, concatenating syllables without forming valid disyllabic words disrupts the semantic validity (c.f., Xiao et al., 2005), as in the pseudo-word utterances in the present study. All participants reported that they considered pseudo-word utterances as semantically invalid.

192 of neural entrainment to broadband envelopes in many other studies. With the syllable rate of  
193 all utterances being controlled at around 4 Hz, delta- and theta-band were defined as 1.5 ~ 3  
194 Hz (average cycle at 500 ms corresponding to 2 Hz) and 3 ~ 6 Hz (average cycle at 250 ms  
195 corresponding to 4 Hz), respectively. Delta- and theta-band thus respectively corresponded to  
196 rhythms at supra-syllable and syllable/sub-syllable rates.

197 We hypothesize that, due to delta- and theta-band neural entrainment reflecting processing  
198 of speech at different cognitive stages (Ding and Simon, 2014), they should also take distinct  
199 roles at different linguistic hierarchical levels. Particularly, as theta rhythms were argued to  
200 reflect the tracking of syllabic and sub-syllabic information (Peña and Melloni, 2012; Giraud  
201 and Poeppel, 2012) that convey phonological contents (Rimol et al., 2005), we predict that  
202 theta-band entrainment should be involved in phonological processing. On the other hand, as  
203 delta-band entrainment may be related to higher-order cognitive processing (Ding et al., 2014;  
204 Vander Ghinst et al., 2016; Molinaro and Lizarazu, 2018), we predict that delta-band  
205 entrainment is involved in semantic-level processing. To test such hypotheses, delta- and theta-  
206 band entrainment were measured and compared statistically across the stimulus types (real-  
207 word, pseudo-word and backward utterances). Subsequently, capacities of mTRFs on  
208 classifying EEG trials into correct stimulus types were further tested to determine the  
209 specificity of neural entrainment at different hierarchical levels. Temporal properties of mTRFs  
210 were finally examined to study how the degrees of delta- and theta-band entrainment vary  
211 across the timescales of neural processing for different stimulus types. We suggest that testing  
212 our hypotheses will consolidate our understanding on neural entrainment of low-frequency  
213 envelopes during speech perception.

214

## 215 **2. Methods**

216 The present study used the EEG data collected from our previous study that investigated  
217 the relationship between brain oscillations and auditory sentence processing (Mai et al., 2016).  
218 Participants, stimuli and experiment paradigms had all been previously described in this study.

### 219 **2.1 Participants**

220 Twenty normal-hearing, native Mandarin speakers from mainland China (8 male; aged 19  
221 ~ 25 years old) were recruited and paid for participating the experiment. No history of  
222 neurological disorders were reported for any participant. All participants were either right-  
223 handed (18 participants with handedness indices (HI) > 40) or towards right-handed (2  
224 participants with HIs = 33.3) according to the Edinburgh Handedness Inventory (Oldfield,  
225 1971).

### 226 **2.2 Stimuli and tasks**

227 Stimuli consisted of three types of continuous Mandarin utterances: (1) real-word, (2)  
228 pseudo-word, and (3) backward utterances. (1) and (2) were naturally produced by a male  
229 native Mandarin speaker recorded at a sampling rate of 22,050 Hz. All were produced with  
230 syllable rates between 3.5 and 4.5 Hz, and some were adjusted by slightly lengthening or  
231 shortening in time via software PRAAT (University of Amsterdam, The Netherlands) in order

232 to keep all utterances at ~ 4 Hz syllable rate. The real-word utterances were semantically  
233 unpredictable sentences (SUSs) (Benoit et al., 1996). Each SUS here was comprised of four  
234 semantically valid disyllabic (two-character) words with a syntactic structure of ‘Subject +  
235 Verb + Attribute + 的 + Object’. Character ‘的’ is a grammatical particle without lexical  
236 meaning. The words within a sentence were not contextually related to each other and it was  
237 impossible to predict a word from the sentence it is in. A sample SUS was ‘网络喜欢坚强的  
238 空气’, in which the disyllabic words were ‘网络’ (‘Internet’), ‘喜欢’ (‘enjoy’), ‘坚强’  
239 (‘tough’), and ‘空气’ (‘air’). The purpose of using SUSs was to prevent participants from  
240 identifying sentence contents from contextual information and to guarantee that they attended  
241 to the entire utterance. Pseudo-word utterances were sentences consisting of the same number  
242 of morphologically valid syllables as in each real-word utterance, but with no two adjacent  
243 syllables forming a semantically valid word. All participants confirmed that all pseudo-word  
244 utterances were semantically invalid for them after the experiment. Backward utterances were  
245 time-reversed versions of the real-word and pseudo-word utterances, which caused substantial  
246 phonological distortion but retain similar acoustic complexity of the speech (temporal  
247 fluctuations, formant distributions, and harmonic structures) (Binder et al., 2000; Londei et al.,  
248 2010; Saur et al., 2010; Gross et al., 2013).

249 There were 80 utterances for each of the three stimulus types without repetition of any  
250 utterance. Half of the backward utterances were generated from randomly selected real-word  
251 utterances with the other half from randomly selected pseudo-word utterances. All stimuli had  
252 a similar duration (2.2 ~ 2.3 seconds) and were adjusted to the same average RMS intensity.

253 During the experiments, participants were seated in front of a computer screen and listened  
254 to the stimuli via EARTONE 3A inserted earphones (Etymotic Research, USA) with a fixed  
255 loudness at ~ 70 dB for all utterances. All stimuli (three types with 80 trials for each type) were  
256 presented in a random order using EPrime 2.0 (Psychology Software Tools, USA). The  
257 paradigm of each trial is shown in Fig. 1. At the start of each trial, there was a 3-second silence  
258 allowing participants to blink, followed by another 1.5-second silence with a white cross  
259 centred on the screen. A cue sound (200 ~ 300 ms; a naturally produced syllable for the real-  
260 word and pseudo-word utterances, or a backward syllable for the backward utterances) was  
261 then presented. These were then followed by a 2-second silence and the target utterance.  
262 Participants were required to complete a sound-matching task. They were instructed to make a  
263 forced-choice judgement whether the cue sound was present in the target utterance or not by  
264 pressing a button representing ‘Yes’ or ‘No’ (on the left or right side of the keyboard) when a  
265 question mark appeared on the screen after the utterance. They were instructed to sit still, keep  
266 their eyes on the white cross and avoid any eye blink or body movement after the cue sound  
267 was played. They were also asked to press the button *only* after the question mark appeared, in  
268 order to avoid motor artefacts during the target period. Feedback of accuracies was given every  
269 30 trials and participants were encouraged to respond as accurately as possible. Overall, the  
270 aim of the sound-matching task was to keep participants actively attending to the target  
271 utterances.

272

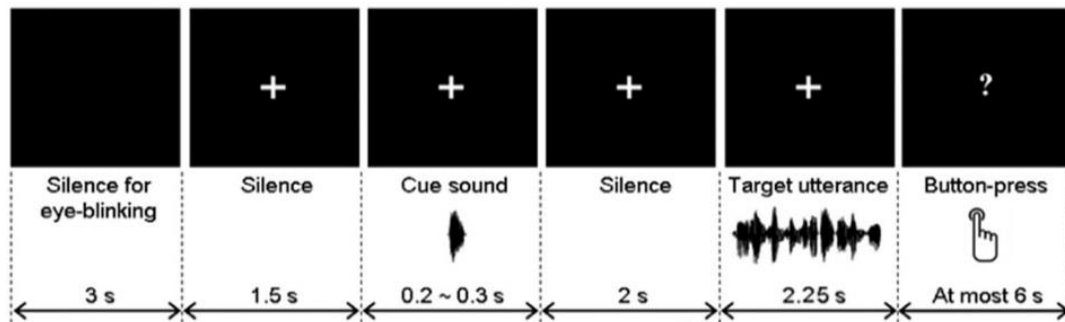

273 **Fig. 1.** Time course of each trial in the experiment. Visual presentations were shown as the top panels  
274 and texts at the bottom describe the corresponding time course of the audio presentation and the sound-  
275 matching task (button-press). The figure is adopted from [Mai et al. \(2016\)](#) with permission.

276 Out of all 80 trials in each stimulus type, 20% of the trials in which the cue sounds were  
277 actually present in the target utterances (16 utterances). In the present study, only the trials  
278 where the cue sounds were *not* present in the target utterances (64 utterances) were included in  
279 the subsequent analyses. This was to preclude the possibility of participants not attending to  
280 the entire utterance period and to avoid auditory repetition effects when the cue sound was  
281 present in the target utterance. This could also minimize possible effects of motor preparation  
282 of button press due to judgments made before the end of the utterance when the cue sound was  
283 present.

284 30 practice trials (utterances all different from the formal test) were run prior to the formal  
285 test. Breaks were taken every 30 trials during the formal test.

### 286 **2.3 EEG recording and preprocessing**

287 Scalp-EEGs were recorded via a 32-electrode ActiveTwo system (Biosemi, The  
288 Netherlands) sampled at 1024 Hz. Bilateral mastoids were used as the reference. Eye artefacts  
289 were detected via vertical (vEOG; electrodes above and below the left eye) and horizontal  
290 EOGs (hEOG; electrodes on the lateral sides of the left and right eyes).

291 Signals of all electrodes (including EOGs) were first re-referenced to the bilateral mastoids  
292 and then bandpass filtered at 0.5 ~ 8 Hz using a zero-phase, 2nd-order Butterworth filter.  
293 Signals for detecting eye artefacts were then obtained by subtracting between signals in  
294 corresponding EOG electrodes (vEOGs and hEOGs for vertical and horizontal artefacts,  
295 respectively). Trials where the filtered EEGs in the target period (target utterances with a fixed  
296 length of 2.25 seconds for all trials) exceeded  $\pm 40 \mu\text{V}$  in any electrode (including vEOG and  
297 hEOG) were treated as being contaminated by eye or body movement artefacts and were  
298 rejected from subsequent analyses.

### 299 **2.4 Extraction of delta- and theta-band EEGs and stimulus envelopes**

300 Delta- and theta-band neural entrainment were calculated via a linear transformation  
301 algorithm based on multivariate Temporal Response Functions (mTRF) ([Di Liberto et al.,](#)  
302 [2015](#); [Crosse et al., 2016](#)). The algorithm calculates the extent of mapping speech envelope  
303 information onto corresponding EEG responses. The algorithm was applied on delta- and theta-



304 band entrainment separately for the three stimulus types (real-word, pseudo-word and  
305 backward) in each participant. Delta-band entrainment was quantified based on the delta-band  
306 EEGs and stimulus envelopes, whilst theta-band entrainment was quantified based on the theta-  
307 band EEGs and stimulus envelopes.

308 EEGs were bandpass filtered at 1.5 ~ 3 Hz (delta) and 3 ~ 6 Hz (theta) using a zero-phase,  
309 2nd-order Butterworth filter. The signals were then decimated to 128 Hz via a 30th-order  
310 Hamming-windowed FIR filter. The delta- and theta-band EEG signals within the artefact-free  
311 target periods were then respectively used for quantifying delta- and theta-band entrainment.

312 The stimulus acoustic envelopes of the artefact-free trials were obtained as follows. First,  
313 each corresponding utterance was bandpass filtered between 100 and 5000 Hz and then  
314 resampled to 16384 Hz (an integer multiple of 128 Hz) using PRAAT. Second, delta- and theta-  
315 band envelopes of each utterance was extracted based on either a single broadband ('BROAD')  
316 or multiple narrowbands ('MULTI'). For the BROAD condition, delta- and theta-band  
317 envelopes were obtained by bandpass filtering the broadband Hilbert envelope of the utterance  
318 at 1.5 ~ 3 Hz and at 3 ~ 6 Hz (using the same filter as in EEGs), respectively. For the 'MULTI'  
319 condition, the utterance were bandpass filtered into 16 logarithmic-spaced acoustic spectral  
320 bands between 100 and 5000 Hz. The delta- and theta-band envelopes were then extracted from  
321 each spectral band following the same way as in the 'BROAD' condition. All acoustic  
322 envelopes were finally decimated to 128 Hz as in EEGs. In this way, for both delta- and theta-  
323 band envelopes, there was only one envelope time series in the 'BROAD' condition, but 16  
324 envelope time series in the 'MULTI' condition.

## 325 2.5 Calculations of TRFs

326 Temporal Response Functions (TRFs) (Di Liberto et al., 2015; Crosse et al., 2016) for all  
327 artefact-free trials were then estimated using a linear transformation algorithm:

$$328 \quad r_i(t) = \sum_j \sum_{\tau=0}^{\tau_{max}} TRF_{ij}(\tau) s_j(t - \tau) + \epsilon_i(t)$$

329 Where  $i$  and  $j$  refer to the  $i$ th electrode and the  $j$ th spectral band of the acoustic stimulus,  
330 respectively;  $r_i(t)$  is the EEG time series;  $TRF_{ij}(t)$  is the time series of the TRF;  $s_j(t)$  is the  
331 time series of the stimulus envelopes;  $\epsilon_i(t)$  is the normally-distributed error term;  $\tau_{max}$  is the  
332 maximum time lag between the EEG series and the stimulus series, which was set at 300 ms in  
333 the present study. The  $TRF_{ij}(t)$  was estimated by minimizing the mean squares of  $\epsilon_i(t)$ . As  
334 such, TRF can be obtained via the following matrix formula:

$$335 \quad TRF_{i,\lambda} = (S^T S + \lambda M)^{-1} S^T r_i$$

336 where  $i$  refers to the  $i$ th electrode;  $S$  is a matrix comprised of lagged time series of the stimulus  
337 envelopes in all spectral bands;  $r_i$  is the vector of EEG series;  $\lambda$  and  $M$  denote the ridge  
338 regression parameter and a quadratic matrix, respectively, during the regularization that  
339 avoided the ill-posed estimation and overfitting (see Crosse et al., 2016). The ridge regression  
340 parameter  $\lambda$  was chosen among a range of values ( $2^{-15}$ ,  $2^{-14}$ , ...,  $2^{14}$ ,  $2^{15}$ ) and the optimal  $\lambda$  was  
341 obtained according to the cross-validation during the training stage (see *Training and testing*).

## 342 2.6 Training and testing

343 Artefact-free trials were divided into a training set and a testing set during the procedure of  
344 training and testing. Here, for each stimulus type (real-word, pseudo-word or backward) and  
345 each participant, we randomly assigned 50 trials to the training set and randomly selected one  
346 of the remaining trials as the testing trial. We replicated the training and testing procedure for  
347 1000 times and the final testing result was treated as the average over the corresponding 1000  
348 testing estimates ('predictive powers' or *PredPowers*, see below). We followed this procedure  
349 due to the different numbers of artefact-free trials across stimulus types and across participants  
350 (recall that there were 64 trials for each stimulus type *prior to* artefact rejection). We considered  
351 that this procedure could keep the number of training and testing trials (50 and 1, respectively)  
352 the same for all stimulus types and participants, and at the same time all trials had similar  
353 chances to be either trained or tested.

354 During the training stage, a 'leave-one-out' cross-validation procedure was followed in  
355 order to obtain the optimal ridge parameter  $\lambda$  and the trained TRF (Crosse et al., 2016). First,  
356 in the training set, one trial was chosen to be 'left out' as a validator, while the remaining trials  
357 were treated as a 'sub-training' set. A predictive EEG series was generated for the validator  
358 using the temporal average of the TRFs across the trials in the sub-training set:

$$359 \quad \widehat{r}_{i,\lambda}(t) = \sum_j \sum_{\tau=0}^{\tau_{max}} \overline{TRF_{ij,\lambda}}(\tau) s_j(t - \tau)$$

360 where  $\widehat{r}_{i,\lambda}(t)$  is the predictive EEG series;  $\overline{TRF_{ij,\lambda}}(t)$  is the average TRF series across the trials  
361 in the sub-training set; and  $s_j(t)$  is the stimulus envelope of the validator. The Pearson  
362 correlation (Fisher-transformed) and the mean-squared error (MSE) between  $\widehat{r}_{i,\lambda}(t)$  and the  
363 actual EEG series of the validator were calculated. Second, a different trial was then selected  
364 as the validator in the next round of validation. The validation procedure was repeated until all  
365 trials in the training set were assigned as validators. The correlation values and MSEs were  
366 then averaged across all validators. The optimal  $\lambda$  value was identified as the one which yielded  
367 the highest correlation value or the lowest MSE. In the present study, we used  $\lambda$  which yielded  
368 the highest correlation value but not the lowest MSE, as we found that the predictive powers  
369 were significantly greater based on the former than on the later (see *Results*). The trained TRF  
370 was finally obtained by averaging the TRFs with the optimal  $\lambda$  value across all trials in the  
371 training set.

372 During the testing stage, the predictive EEG series was obtained based on the trained TRF  
373 and the stimulus envelope series of the testing trial, following the same procedure as in each  
374 round of validation in the training stage. Then the Pearson correlation was calculated between  
375 the predictive EEG series and the actual EEG series of the testing trial. The 'predictive power'  
376 (*PredPower*) was quantified as the Fisher-transform of the correlation value. The final  
377 *PredPower* was obtained as the average across the 1000 times of training and testing.

## 378 2.7 Surrogate and random predictive powers (*PredPowers*)

379 Surrogate and random *PredPowers* were calculated as baselines to prove the fidelity of the  
380 results obtained from our data. Surrogate *PredPowers* were obtained as follows. During each  
381 round of training and testing, the testing trial selected for each given stimulus type was assigned

382 to the other two stimulus types as a testing ‘surrogate’. The surrogate *PredPowers* for a given  
383 stimulus type were then defined as the predictive powers that were obtained using testing trials  
384 from different stimulus types. The results were finally averaged across all stimulus types and  
385 across the 1000 times of training and testing. To obtain random *PredPowers*, 51 random ‘trials’  
386 (50 for the training set and one for testing) were created, each of which consisted of an ‘EEG’  
387 series and a corresponding ‘stimulus’ series, both being pseudo-randomly generated Gaussian  
388 noises with the same length of each target period in the experiment (2.25 seconds). *PredPowers*  
389 were calculated in the same way as in the real data. Such procedure was replicated 1000 times  
390 and the random *PredPowers* were finally grand-averaged.

391 We predicted that, if *PredPowers* are valid measurements and TRFs can specifically encode  
392 envelope information of the respective stimulus types, the ‘congruent’ *PredPowers* (those  
393 based on testing trials from the same stimulus type) should be statistically greater than both  
394 surrogate and random *PredPowers*. We also predicted that, as some acoustic features (such as  
395 acoustic rhythms and spectrotemporal complexity) are commonly shared between stimulus  
396 types, surrogate *PredPowers* could also be above random level.

## 397 **2.8 Classification of EEG trials using mTRFs**

398 Classification capacity was tested for multivariate TRFs (mTRFs). If *PredPowers* can  
399 index the neural entrainment at different linguistic hierarchical levels, mTRFs should have the  
400 capacity to classify EEGs between different stimulus types. Similar to the calculation of  
401 surrogate *PredPowers*, the testing trial in each stimulus type was assigned to the other two  
402 stimulus types as a testing surrogate during each round of training and testing. As such, the  
403 mTRF in each given stimulus type generated one congruent *PredPower* and two surrogate  
404 *PredPowers*. The capacity of mTRF was estimated by whether it could accurately identify the  
405 congruent testing trial (the trial from the same stimulus type). We considered that the  
406 classification of mTRF was ‘accurate’ if the congruent *PredPower* was greater than the  
407 surrogate *PredPowers*. The accuracies were finally averaged over the 1000 times of training  
408 and testing.

409 Furthermore, the classification capacity in each stimulus type was estimated in two  
410 scenarios: (1) classification among all stimulus types, i.e., when mTRF of each given stimulus  
411 type was tested by trials from all three stimulus types (Scenario\_1); (2) classification between  
412 two stimulus types, i.e., when mTRF of each given stimulus type trials was tested by trials from  
413 two stimulus types, one from the same stimulus type of the given mTRF and the other from a  
414 different stimulus type (e.g., mTRF<sub>real-word</sub> with testing trials from real-word and pseudo-word  
415 utterances) (Scenario\_2).

## 416 **2.9 Temporal properties of mTRFs**

417 Time series of mTRF were obtained by averaging over the 1000 trained mTRFs for each  
418 stimulus type and each participant. Absolute values of the time series were then obtained as the  
419 absolute weighting series in each spectral band. Absolute values were used here because they  
420 could reflect the extent of mTRF contributions to the neural entrainment regardless of the sign  
421 of the weighting. The absolute series were averaged across all spectral bands (i.e., 16 bands).

422 Temporal properties of the absolute weighting were then examined to study how the  
423 degrees of neural entrainment vary across time lags. Recall that the range of time lags was set  
424 as 0 ~ 300 ms (see *Calculations of TRFs*). The time lags were divided into ‘early’ (20 ~ 160

425 ms) and ‘later’ (160 ~ 300 ms) stages (each covered 140 ms). The absolute weighting were  
426 compared across the time ranges (‘early’ vs. ‘later’) and stimulus types.

## 427 2.10 Sequences of statistical analyses

428 Calculations of *PredPowers* and TRFs were all electrode-wise and separately conducted  
429 for delta- and theta-band entrainment, based on the delta- and theta-band EEGs and stimulus  
430 envelopes, respectively (see *Extraction of delta- and theta-band EEGs and stimulus*  
431 *envelopes*). Statistical analyses were also conducted for delta- and theta-band entrainment  
432 separately. Also, the analyses were conducted based on *PredPowers* and TRFs averaged over  
433 the centro-frontal electrodes. This is because the neural entrainment measured with EEGs is  
434 dominant over centro-frontal (compared to parieto-occipital) region for the auditory modality  
435 (Crosse et al., 2015, 2016). The centro-frontal electrodes were defined as the 22 electrodes  
436 shown in Fig. 2 (indicated by the shaded trapezoid). All statistical analyses were within-subject  
437 analyses (Repeated Measures ANOVAs followed by post-hoc pairwise t-tests).

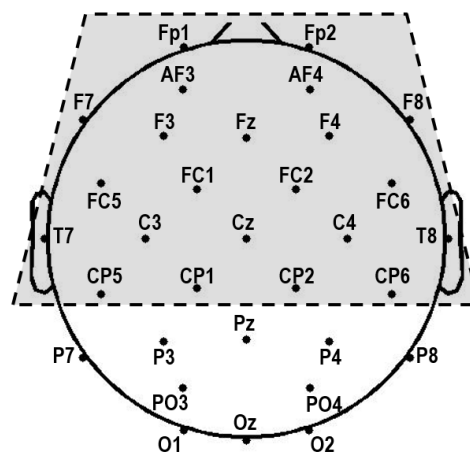

438

439 **Fig. 2.** Channel configuration. Statistical analyses were based on the centro-frontal electrodes (indicated  
440 by the shaded trapezoid).

441 *PredPowers* were first compared between the ‘BROAD’ condition (using TRFs based on  
442 the broadband envelopes of the stimuli, or univariate TRFs) and the ‘MULTI’ condition (using  
443 TRFs based on stimulus envelopes extracted from 16 spectral bands, or multivariate TRFs  
444 (mTRFs)) (see *Extraction of delta- and theta-band EEGs and stimulus envelopes*). Results  
445 showed that *PredPowers* were significantly greater in the ‘MULTI’ than in the ‘BROAD’  
446 condition at both delta and theta bands (see *Results*). This is consistent with previous findings  
447 showing that mTRF models are superior to univariate TRF models for predicting low-  
448 frequency EEG responses during speech perception (Di Liberto et al., 2015). Accordingly, we  
449 used the mTRF, but not univariate TRF model, during the subsequent signal processing and  
450 statistical analyses.

451 Fidelity of *PredPowers* were then tested by comparing those with the surrogate and random  
452 *PredPowers*. Next, *PredPowers* were compared across the three stimulus types (real-word,  
453 pseudo-word and backward) to test how neural entrainment changes at different linguistic  
454 hierarchical levels. Classification capacity of mTRFs were then tested in order to examine the

455 specificity of neural entrainment for different stimulus types. Temporal properties of mTRFs  
456 were finally examined to study the degrees of neural entrainment across time lags.

457 The EEG signal processing was conducted using Matlab 2014a (MathWorks, USA).  
458 Statistical analyses were conducted using SPSS 23 (IBM, USA).

459

### 460 **3. Results**

461 At least 51 trials were retained after artefact rejection in all stimulus types for all  
462 participants. The average numbers of retained trials were 59.1 (SE: 0.7), 58.3 (SE: 0.7) and  
463 58.9 (SE: 0.9) for real-word, pseudo-word and backward utterances, respectively. No  
464 significant difference for the number of trials was found between any two stimulus types (all  $p$   
465  $> 0.1$ , uncorrected). Behavioral results can be found in [Mai et al \(2016\)](#). Response accuracies  
466 were significantly higher than the 50% chance-level for all stimulus types ( $> 95\%$  for real-word  
467 and pseudo-word utterances and  $> 70\%$  for the backward utterances; all  $p < 10^{-8}$ , uncorrected),  
468 indicating that participants had complied with the instructions to actively attend to the stimuli.

469 All statistical analyses on EEGs were conducted based on the averages over the 22 centro-  
470 frontal electrodes (see *Methods*). Repeated Measures ANOVAs were conducted with  
471 Greenhouse-Geisser correction. All  $p$ -values in the pairwise comparisons between any two  
472 stimulus types were Bonferroni corrected by the factor of 3 (due to the three stimulus types)  
473 unless specified as ‘uncorrected’.

#### 474 **3.1 Univariate TRF vs. mTRF**

475 *PredPowers* were compared between the univariate TRF and mTRF models. Before such  
476 comparisons were conducted, it was first determined that the optimal  $\lambda$  value (the ridge  
477 regression parameter, see *Methods*) was identified as the one which yielded the highest Pearson  
478 correlation value (Fisher-transformed) but not the lowest MSE during the cross-validation. This  
479 was because *PredPowers* were found to be significantly greater based on the former than on  
480 the latter in both univariate TRF and mTRF models (all  $p < 0.01$ ).

481 Repeated Measures ANOVAs were then conducted for the delta- and theta-band  
482 *PredPowers* with factors of TRF Type (univariate TRF vs. mTRF) and Stimulus Type (real-  
483 word vs. pseudo-word vs. backward). The results showed significant main effects of TRF Type  
484 and Stimulus Type, but no [TRF Type  $\times$  Stimulus Type] interactions, for both delta- and theta-  
485 band *PredPowers* (see **Table 1** for detailed statistics). Specifically, both delta- and theta-band  
486 *PredPowers* were significantly greater when using mTRF compared to univariate TRF (see  
487 **Fig. 3**). As we only focused on the differences of the two TRF types in this section, post-hoc  
488 analyses following the main effects of Stimulus Type are not reported here.

489 The results thus showed the superiority of mTRF to univariate TRF, consistent with the  
490 previous finding ([Di Liberto et al., 2015](#)). The subsequent signal processing and statistical  
491 analyses were hence based on mTRF, but not on univariate TRF.

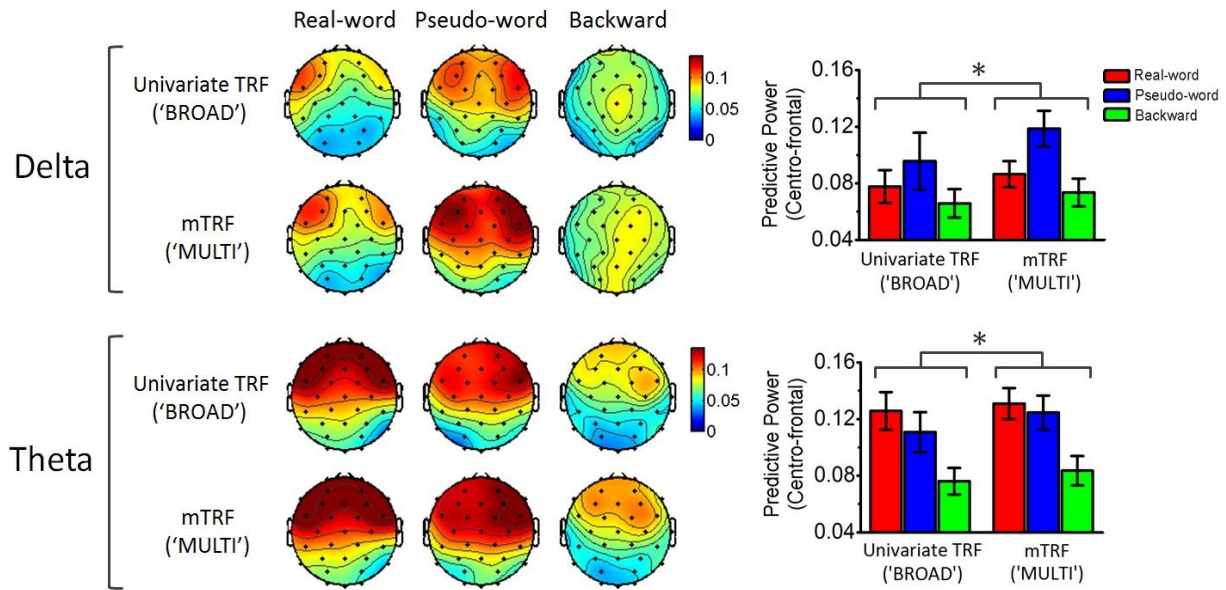

492

493 **Fig. 3.** Comparisons of *PredPowers* between univariate TRF ('BROAD') and mTRF ('MULTI')  
 494 models. Scalp topographies for different stimulus types are shown on the left and *PredPowers* averaged  
 495 across the centro-frontal electrodes were shown on the right. Errors bars denote standard errors of the  
 496 mean (SEMs). \* = significance at  $p < 0.05$ .

497 **Table 1.** Statistical results of Repeated Measures ANOVAs for *PredPowers* averaged over the centro-  
 498 frontal electrodes. The effects of the TRF type (univariate TRF vs. mTRF) and Congruency (congruent  
 499 vs. surrogate; for *PredPowers* based on mTRF) were tested, respectively. *Df*, *F*, *p* and  $\eta_p^2$  refer to  
 500 degrees of freedom, F-values, *p*-values and partial eta-squared, respectively. The statistics were  
 501 Greenhouse-Geisser corrected. Numbers are all rounded to three decimal places, unless they are <  
 502 0.001. Significant *p*-values are indicated in bold. \* = significance at  $p < 0.05$ ; \*\* = significance at  $p <$   
 503 0.01; \*\*\* = significance at  $p < 0.001$ .

| Dependent variables                  | Band  | Factors                           | <i>df1</i> | <i>df2</i> | <i>F</i> | <i>p</i>                       | $\eta_p^2$ |
|--------------------------------------|-------|-----------------------------------|------------|------------|----------|--------------------------------|------------|
| <i>PredPower</i>                     | Delta | TRF Type                          | 1          | 19         | 5.369    | <b>0.032*</b>                  | 0.220      |
|                                      |       | Stimulus Type                     | 1.710      | 32.494     | 5.429    | <b>0.012*</b>                  | 0.222      |
|                                      |       | TRF Type $\times$ Stimulus Type   | 1.369      | 26.003     | 1.196    | 0.302                          | 0.059      |
|                                      | Theta | TRF Type                          | 1          | 19         | 6.650    | <b>0.018*</b>                  | 0.259      |
|                                      |       | Stimulus Type                     | 1.539      | 29.233     | 7.543    | <b>0.004**</b>                 | 0.284      |
|                                      |       | TRF Type $\times$ Stimulus Type   | 1.759      | 33.424     | 1.290    | 0.286                          | 0.064      |
| <i>PredPower</i><br>based on<br>mTRF | Delta | Congruency                        | 1          | 19         | 26.638   | <b>&lt; 10<sup>-4</sup>***</b> | 0.584      |
|                                      |       | Stimulus Type                     | 1.950      | 37.056     | 7.510    | <b>0.002**</b>                 | 0.283      |
|                                      |       | Congruency $\times$ Stimulus Type | 1.830      | 34.769     | 1.196    | <b>0.003**</b>                 | 0.282      |
|                                      | Theta | Congruency                        | 1          | 19         | 40.280   | <b>&lt; 10<sup>-5</sup>***</b> | 0.679      |
|                                      |       | Stimulus Type                     | 1.313      | 24.944     | 7.602    | <b>0.007**</b>                 | 0.286      |
|                                      |       | Congruency $\times$ Stimulus Type | 1.710      | 32.486     | 4.746    | <b>0.020*</b>                  | 0.200      |

504

### 505 3.2 Fidelity of *PredPowers*

506 Fidelity of *PredPowers* (based on mTRFs) were tested by comparing congruent  
507 *PredPowers* (training and testing trials from the same stimulus type) with surrogate (training  
508 and testing trials from different stimulus types) and random (pseudo-random noise)  
509 *PredPowers*. The results are illustrated in **Fig. 4**.

510 We first test whether *PredPowers* obtained from real data (congruent and surrogate) were  
511 statistically above random level. We found that all congruent *PredPowers* at delta and theta  
512 bands were significantly greater than random *PredPowers* for all stimulus types (all  $p < 10^{-4}$ ,  
513 uncorrected). Surrogate *PredPowers* were significantly greater than random *PredPowers* for  
514 all stimulus types (all  $p < 0.005$ , uncorrected), except that at the delta-band for the backward  
515 utterances ( $p = 0.052$ , uncorrected). We suggest it is reasonable that, not only congruent  
516 *PredPowers*, but also surrogate *PredPowers* were greater than the random level, possibly  
517 because some acoustic features (e.g., acoustic rhythms and spectrotemporal complexity) were  
518 commonly shared across different stimulus types, resulting in these features being encoded in  
519 mTRFs.

520 Next, the effects of Congruency (congruent vs. surrogate) were tested. Repeated Measures  
521 ANOVAs were conducted with factors of Congruency and Stimulus Type. Main effects of  
522 Congruency and Stimulus Type, and [Congruency  $\times$  Stimulus Type] interactions were all found  
523 to be significant at both delta and theta bands (see **Table 1**). Post-hoc pairwise comparisons  
524 following the significant interactions showed that, at the delta band, congruent *PredPower* was  
525 significantly greater than surrogate *PredPower* only for pseudo-word utterances ( $t_{(19)} = 7.984$ ,  
526  $p < 10^{-6}$ ), but not for real-word ( $t_{(19)} = 2.449$ ,  $p = 0.073$ ) or backward utterances ( $t_{(19)} = 2.056$ ,  
527  $p = 0.161$ ) (see **Fig. 4** upper panels). At the theta band, congruent *PredPower* was significantly  
528 greater than surrogate *PredPower* for real-word ( $t_{(19)} = 5.769$ ,  $p < 10^{-5}$ ) and pseudo-word  
529 utterances ( $t_{(19)} = 5.733$ ,  $p < 10^{-5}$ ), but not for backward utterances ( $t_{(19)} = 1.162$ ,  $p = 0.779$ ) (see  
530 **Fig. 4** lower panels).

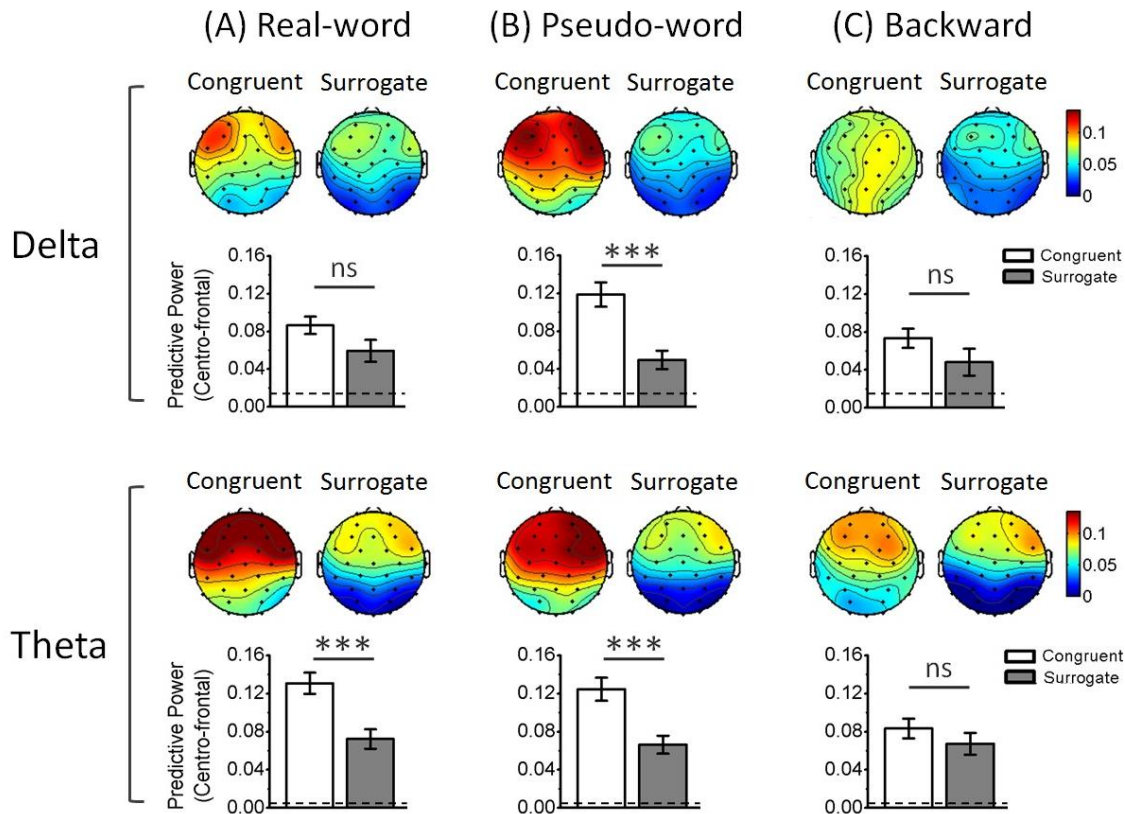

531

532 **Fig. 4.** Comparisons between congruent and surrogate *PredPowers*. All *PredPowers* were calculated  
 533 based on the mTRF model. Bar graphs illustrated the comparisons averaged over the centro-frontal  
 534 electrodes for different stimulus types. Statistical significance were Bonferroni corrected by the factor  
 535 of 3 (three stimulus types). Dashed lines indicate the values of random *PredPowers*. Errors bars denote  
 536 SEMs. \*\*\* = significance at  $p < 0.001$ ; ns = not significant.

537

### 538 3.3 Comparisons of *PredPowers* between stimulus types

539 Results for comparisons of *PredPowers* between stimulus types are illustrated in **Fig. 5**.  
 540 Repeated Measures ANOVAs were conducted with the factor of Stimulus Type. Significant  
 541 main effects of Stimulus Type were found for both delta- and theta-band *PredPowers* (see  
 542 **Table 2**). Post-hoc comparisons showed that, at the delta band, *PredPower* was significantly  
 543 greater for pseudo-word than for real-word and backward utterances, while no significant  
 544 difference was found between real-word and backward utterances (see **Fig. 5** and **Table 3**,  
 545 delta-band *PredPowers*). At the theta band, *PredPower* was significantly greater for real-word  
 546 and pseudo-word than for backward utterances, while no significant difference was found  
 547 between real-word and pseudo-word utterances (see **Fig. 5** and **Table 3**, theta-band  
 548 *PredPowers*).

549



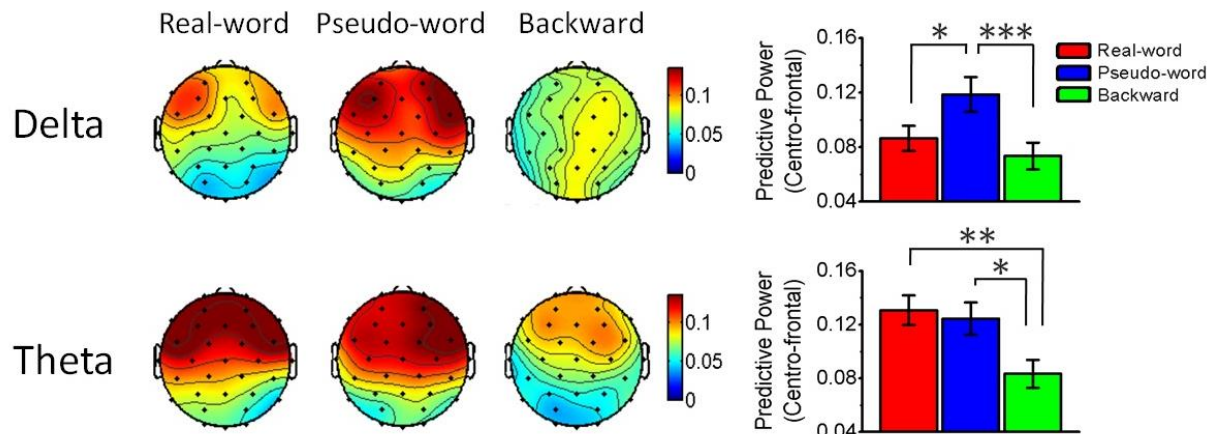

550

551 **Fig. 5.** Comparisons of *PredPowers* across stimulus types. All *PredPowers* were calculated based on  
 552 the mTRF model. Bar graphs illustrated the comparisons averaged over the centro-frontal electrodes.  
 553 Statistical significance were Bonferroni corrected by the factor of 3. Errors bars denote SEMs. \* =  
 554 significance at  $p < 0.05$ ; \*\* = significance at  $p < 0.01$ ; \*\*\* = significance at  $p < 0.001$ .

555

556 **Table 2.** Statistical results of Repeated Measures ANOVAs for *PredPowers* (based on mTRF) and the  
 557 classification capacity of mTRFs across stimulus types. All were based on the centro-frontal electrodes.  
 558 Note that ANOVAs for the mTRF classification were conducted only in Scenario\_1 (when mTRFs were  
 559 tested by trials from all three stimulus types), but not in Scenario\_2 (when mTRFs were tested by trials  
 560 from two stimulus types). *Df*, *F*, *p* and  $\eta_p^2$  refer to degrees of freedom, F-values, *p*-values and partial  
 561 eta-squared, respectively. The statistics were Greenhouse-Geisser corrected. Numbers are all rounded  
 562 to three decimal places, unless they are  $< 0.001$ . Significant *p*-values are indicated in bold. \* =  
 563 significance at  $p < 0.05$ ; \*\* = significance at  $p < 0.01$ ; \*\*\* = significance at  $p < 0.001$ .

| Dependent variables                          | Band  | Factors       | <i>df</i> <sub>1</sub> | <i>df</i> <sub>2</sub> | <i>F</i> | <i>p</i>             | $\eta_p^2$ |
|----------------------------------------------|-------|---------------|------------------------|------------------------|----------|----------------------|------------|
| <i>PredPower</i> based on mTRF               | Delta | Stimulus Type | 1.633                  | 31.019                 | 11.105   | <b>&lt; 0.001***</b> | 0.369      |
|                                              | Theta | Stimulus Type | 1.555                  | 29.542                 | 7.956    | <b>0.003**</b>       | 0.295      |
| Classification accuracy of mTRF (Scenario_1) | Delta | Stimulus Type | 1.823                  | 31.019                 | 6.793    | <b>0.004**</b>       | 0.263      |
|                                              | Theta | Stimulus Type | 1.902                  | 36.133                 | 3.344    | <b>0.049*</b>        | 0.150      |

564

565 **Table 3.** Pairwise comparisons for *PredPowers* (based on mTRF) and the classification capacity of  
 566 mTRFs between different stimulus types. The comparisons for *PredPowers* and classification  
 567 accuracies of mTRFs in Scenario\_1 were post-hoc analyses following the significant main effects of  
 568 Stimulus Type (see **Table 2**). *Df*, *t* and *p* refer to degrees of freedom, t-values and *p*-values, respectively.  
 569 All *p*-values were Bonferroni corrected by the factor of 3 (three stimulus types). Numbers are all  
 570 rounded to three decimal places, unless they are  $< 0.001$  or  $p > 1$ . Significant *p*-values are indicated in  
 571 bold. \* = significance at  $p < 0.05$ ; \*\* = significance at  $p < 0.01$ ; \*\*\* = significance at  $p < 0.001$ .

| Dependent variables | Band  | Comparisons               | <i>df</i> | <i>t</i> | <i>p</i>      |
|---------------------|-------|---------------------------|-----------|----------|---------------|
|                     | Delta | Real-word vs. pseudo-word | 19        | -2.693   | <b>0.043*</b> |

|                                                    |       |                           |    |        |                   |
|----------------------------------------------------|-------|---------------------------|----|--------|-------------------|
|                                                    |       | Real-word vs. backward    | 19 | 1.417  | 0.518             |
|                                                    |       | Pseudo-word vs. backward  | 19 | 5.623  | < $10^{-4}$ ***   |
| <i>PredPower</i><br>based on mTRF                  | Theta | Real-word vs. pseudo-word | 19 | 0.703  | > 1               |
|                                                    |       | Real-word vs. backward    | 19 | 3.431  | <b>0.008**</b>    |
|                                                    |       | Pseudo-word vs. backward  | 19 | 2.718  | <b>0.041*</b>     |
|                                                    |       |                           |    |        |                   |
| Classification<br>accuracy of mTRF<br>(Scenario_1) | Delta | Real-word vs. pseudo-word | 19 | -2.881 | <b>0.029*</b>     |
|                                                    |       | Real-word vs. backward    | 19 | -0.232 | > 1               |
|                                                    |       | Pseudo-word vs. backward  | 19 | 3.425  | <b>0.009**</b>    |
|                                                    | Theta | Real-word vs. pseudo-word | 19 | 0.112  | > 1               |
|                                                    |       | Real-word vs. backward    | 19 | 2.148  | 0.134             |
|                                                    |       | Pseudo-word vs. backward  | 19 | 2.094  | 0.150             |
| Classification<br>accuracy of mTRF<br>(Scenario_2) | Delta | Real-word vs. pseudo-word | 19 | -3.413 | <b>0.009**</b>    |
|                                                    |       | Real-word vs. backward    | 19 | 2.148  | > 1               |
|                                                    |       | Pseudo-word vs. backward  | 19 | 4.694  | < <b>0.001***</b> |
|                                                    | Theta | Real-word vs. pseudo-word | 19 | 0.448  | > 1               |
|                                                    |       | Real-word vs. backward    | 19 | 3.450  | <b>0.008**</b>    |
|                                                    |       | Pseudo-word vs. backward  | 19 | 3.112  | <b>0.017*</b>     |

### 572 3.4 Classification capacity of mTRFs

573 **Fig. 6** and **Fig. 7** show the results of classification capacity of mTRFs.

574 **Fig. 6** shows the accuracies of classification among all stimulus types (Scenario\_1). The  
575 mTRF of each given stimulus type was tested by trials from all three stimulus types. Repeated  
576 Measures ANOVAs were conducted with the factor of Stimulus Type. Main effects of Stimulus  
577 Type were found at both delta and theta bands (see **Table 2**, mTRF classification in  
578 Scenario\_1). Post-hoc tests found that, at the delta band, accuracies were significantly higher  
579 for pseudo-word than for real-word and backward utterances, while no significant difference  
580 was found between those for real-word and backward utterances (see **Fig. 6** and **Table 3**, delta-  
581 band mTRF classification in Scenario\_1). At the theta band, no significant differences of  
582 accuracies were found between any two stimulus types (see **Fig. 6** and **Table 3**, theta-band  
583 mTRF classification in Scenario\_1).

584 **Fig. 7** shows the accuracies of classification between any two stimulus types (Scenario\_2).  
585 The mTRF of each given stimulus type was tested by trials from two stimulus types, one from  
586 the same stimulus type and the other from a different stimulus type. We tested three pairs of  
587 comparisons: (1) real-word vs. pseudo-word (mTRF<sub>Real-word</sub> and mTRF<sub>Pseudo-word</sub> tested by trials  
588 from both real-word and pseudo-word utterances); (2) real-word vs. pseudo-word (mTRF<sub>Real-</sub>  
589 word and mTRF<sub>Backward</sub> tested by trials from both real-word and backward utterances); (3)  
590 pseudo-word vs. backward (mTRF<sub>Pseudo-word</sub> and mTRF<sub>Backward</sub> tested by trials from both  
591 pseudo-word and backward utterances). At the delta band, the results resembled those in  
592 Scenario\_1, where accuracies were significantly higher for pseudo-word than for real-word and  
593 backward utterances, and there was no significant difference between real-word and backward  
594 utterances (see **Fig. 7** and **Table 3**, delta-band mTRF classification in Scenario\_2). At the theta  
595 band, accuracies were significantly higher for real-word and pseudo-word than backward

596 utterances, and no significant difference was found between real-word and pseudo-word  
 597 utterances (see **Fig. 7** and **Table 3**, theta-band mTRF classification in Scenario\_2).

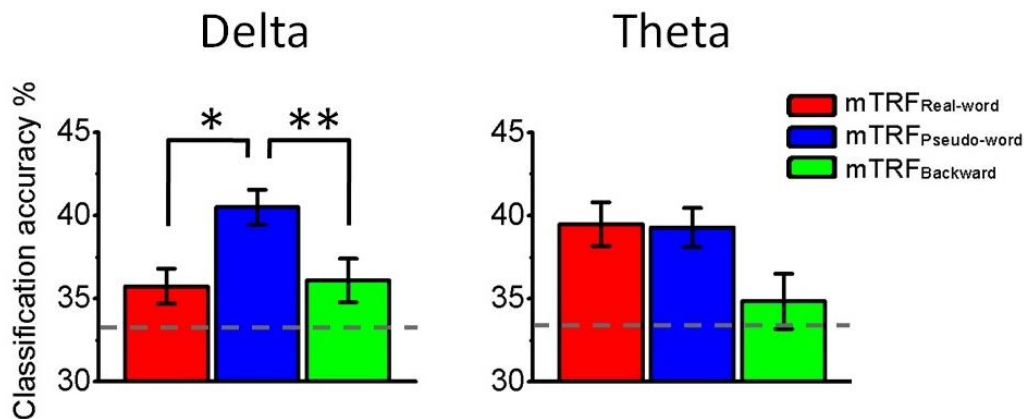

598

599 **Fig. 6.** Accuracies of mTRF classification among all stimulus types (Scenario\_1). The mTRF of each  
 600 given stimulus types were tested by trials from all three stimulus types. Accuracies were based on  
 601 *PredPowers* averaged over the centro-frontal electrodes. Statistical significance were Bonferroni  
 602 corrected by the factor of 3. Dashed lines indicate the chance level (33.33%). Errors bars denote SEMs.  
 603 \* = significance at  $p < 0.05$ ; \*\* = significance at  $p < 0.01$ .

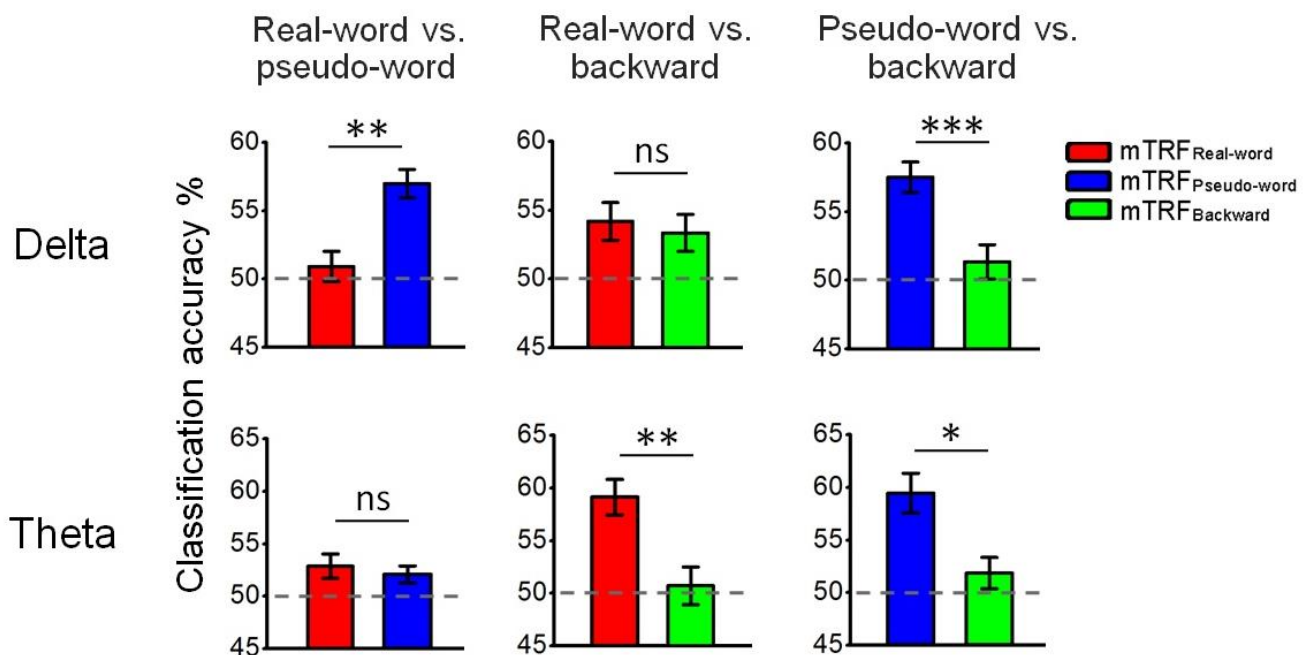

604

605 **Fig. 7.** Accuracies of mTRF classification between any two stimulus types (Scenario\_2). The mTRF of  
 606 each given stimulus type was tested by trials from two stimulus types (one from the same stimulus type,  
 607 the other from a different stimulus type). The accuracies were based on *PredPowers* averaged over the  
 608 centro-frontal electrodes. Statistical significance were Bonferroni corrected by the factor of 3. Dashed  
 609 lines indicate the chance level (50%). Errors bars denote SEMs. \* = significance at  $p < 0.05$ ; \*\* =  
 610 significance at  $p < 0.01$ ; \*\*\* = significance at  $p < 0.001$ .

### 611 3.5 Temporal properties of mTRFs

612 **Fig. 8** shows the spectrotemporal representations of mTRFs for different stimulus types  
613 averaged over the centro-frontal electrodes. Delta mTRFs (upper panels) showed temporal  
614 fluctuations that persisted across the entire 300-ms range for all stimulus types, while theta  
615 mTRFs (lower panels) showed N1-P1-N2-like complexes within the first 150 ms before the  
616 weighting reached a relatively low and stable level. **Fig. 9** shows the absolute mTRF weighting  
617 averaged across the 16 spectral bands. To examine how the degrees of neural entrainment vary  
618 across time lags for different stimulus types, Repeated Measures ANOVAs were conducted for  
619 the absolute weighting with the factors of Time ('early' (20 ~ 160 ms) vs. 'later' (160 ~ 300  
620 ms)) and Stimulus Type. For delta-band absolute weighting, no significant main effects of Time  
621 or Stimulus Type, or [Time × Stimulus Type] interaction were found (see **Table 4**, delta-band).  
622 For theta-band absolute weighting, there was a significant main effect of Time, but no  
623 significant main effect of Stimulus Type or [Time × Stimulus Type] interaction (see **Table 4**,  
624 theta-band). Theta-band absolute weighting was significantly greater at the 'early' than at the  
625 'later' time lags (see **Fig. 9**). The statistical results are thus consistent with the features of mTRF  
626 series shown in **Fig. 8**.

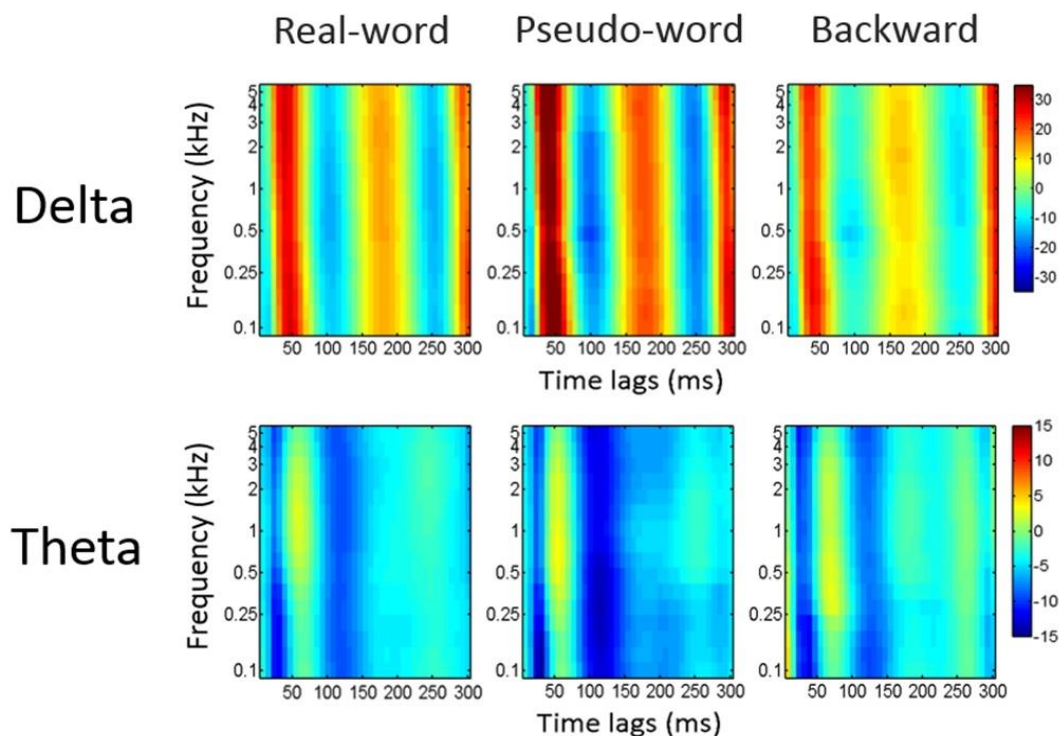

627

628 **Fig. 8.** Spectrotemporal representations of mTRFs averaged over the centro-frontal electrodes. Note that  
629 frequencies are in logarithmic scale divided into 16 spectral bands (see *Methods*).

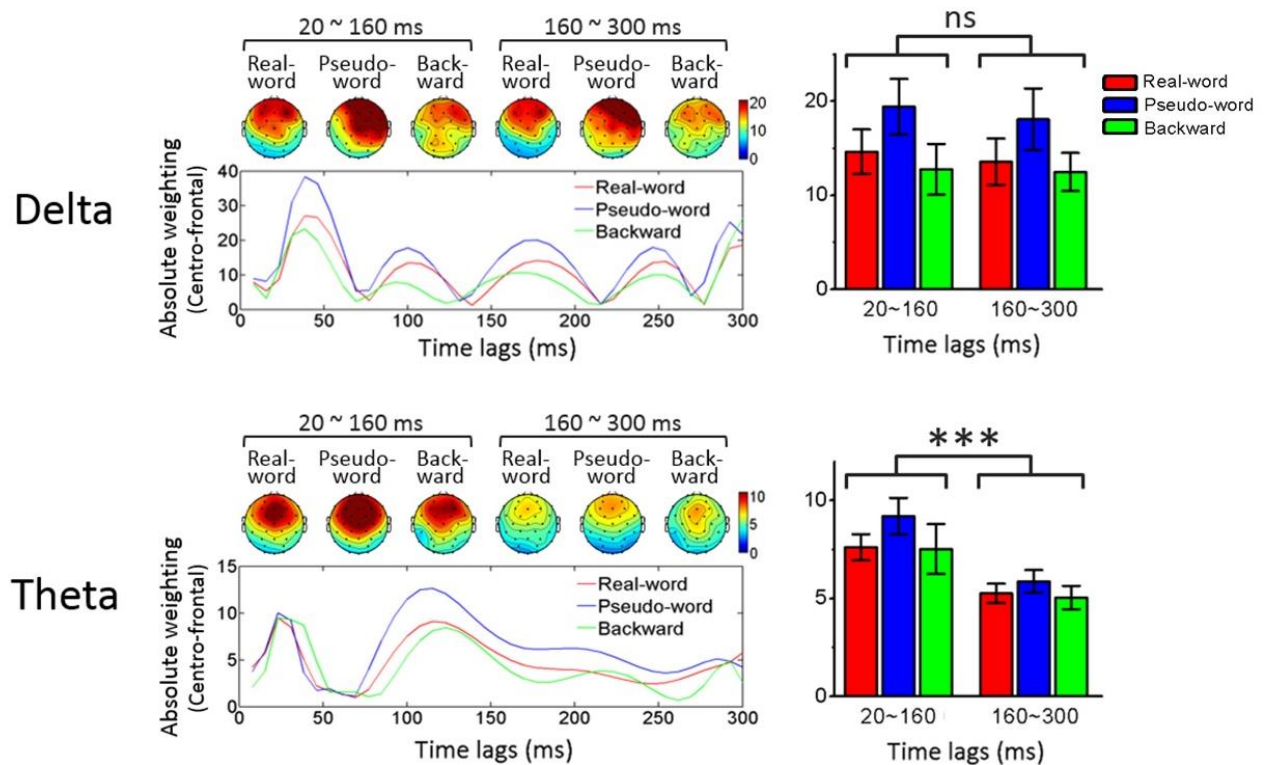

630

631 **Fig. 9.** Absolute weighting of mTRFs. Left panels show the time series of absolute weighting averaged  
 632 over the 16 spectral bands and the centro-frontal electrodes (the line graphs) and the corresponding  
 633 scalp topographies of the ‘early’ (20 ~ 160 ms) and ‘later’ (160 ~ 300 ms) time lags for different stimulus  
 634 types. Right panels show the comparisons of the absolute weighting between time lags (‘early’ vs.  
 635 ‘later’). Errors bars denote SEMs. \*\*\* = significance at  $p < 0.001$ ; ns = not significant.

636 **Table 4.** Statistical results of Repeated Measures ANOVAs for absolute weighting of mTRFs (averaged  
 637 over the centro-frontal electrodes) across Time (‘early’ vs. ‘later’) and stimulus types.  $Df$ ,  $F$ ,  $p$  and  $\eta_p^2$   
 638 refer to degrees of freedom, F-values,  $p$ -values and partial eta-squared, respectively. The statistics were  
 639 Greenhouse-Geisser corrected. Numbers are all rounded to three decimal places, unless they are  $<$   
 640 0.001. Significant  $p$ -values are indicated in bold. \*\*\* = significance at  $p < 0.001$ .

| Dependent variables         | Band  | Factors                     | $df1$ | $df2$  | $F$    | $p$                            | $\eta_p^2$ |
|-----------------------------|-------|-----------------------------|-------|--------|--------|--------------------------------|------------|
| Absolute weighting of mTRFs | Delta | Time                        | 1     | 19     | 0.811  | 0.379                          | 0.041      |
|                             |       | Stimulus Type               | 1.712 | 32.531 | 2.182  | 0.135                          | 0.103      |
|                             |       | Time $\times$ Stimulus Type | 1.573 | 29.893 | 0.131  | 0.829                          | 0.007      |
|                             | Theta | Time                        | 1     | 19     | 43.675 | <b><math>10^{-5***}</math></b> | 0.697      |
|                             |       | Stimulus Type               | 1.899 | 36.076 | 1.151  | 0.326                          | 0.057      |
|                             |       | Time $\times$ Stimulus Type | 1.768 | 33.583 | 0.464  | 0.609                          | 0.024      |

### 641 3.6 Result summary

642 The results are summarized in **Table 5**. We first showed that *PredPowers* were statistically  
 643 greater when using mTRFs compared to univariate TRFs, consistent with the previous finding  
 644 (Di Liberto et al., 2015). We then confirmed that *PredPowers* based on mTRFs were above

645 random level and tested the effectiveness of EEG encoding congruent stimulus envelope  
 646 information. Congruent *PredPowers* were statistically greater than surrogate *PredPowers* for  
 647 pseudo-word utterances at the delta band and for speech (real-word and pseudo-word)  
 648 utterances at the theta band.

649 *PredPowers* and classification capacity of mTRFs were then compared across stimulus  
 650 types. The results showed a consistent pattern that delta- and theta-band entrainment take  
 651 differential roles at different linguistic hierarchical levels. Specifically, delta-band *PredPower*  
 652 was significantly greater for pseudo-word than for real-word and backward utterances, while  
 653 theta-band *PredPower* was significantly greater for speech than for non-speech (backward)  
 654 utterances. Correspondingly, delta-band mTRF had significantly better performances for  
 655 pseudo-word than for real-word and backward utterances, whilst theta-band mTRF had  
 656 significantly better performances for speech than for non-speech utterances.

657 We finally examined the temporal properties of the mTRF series, showing that the absolute  
 658 weighting of mTRF at the theta, but not delta band, was significantly greater at early time lags  
 659 (20 ~ 160 ms) than at later time lags (160 ~ 300 ms). This indicated that delta-band entrainment  
 660 is likely to maintain across neural processing stages up to 300 ms, while theta-band entrainment  
 661 mainly occurs at early stages of neural processing (< 160 ms).

662

663 **Table 5.** Brief summary of the results. ‘Speech’ refers to both real-word and pseudo-word utterances,  
 664 while ‘non-speech’ refers to backward utterances.

| Band  | Testing effects                                  | Descriptions for statistically significant results                                                               |
|-------|--------------------------------------------------|------------------------------------------------------------------------------------------------------------------|
| Delta | Univariate TRF vs. mTRF                          | Greater <i>PredPowers</i> based on mTRFs than on univariate TRFs                                                 |
|       | Congruency                                       | Greater congruent than surrogate <i>PredPowers</i> for pseudo-word, but not for real-word or backward utterances |
|       | <i>PredPowers</i> across stimulus types          | Greater <i>PredPowers</i> for pseudo-word than for real-word and backward utterances                             |
|       | Classification capacity of mTRFs                 | Better performances for pseudo-word than for real-word and backward utterances                                   |
|       | Temporal property of mTRFs (‘early’ vs. ‘later’) | No difference of absolute weighting between early and later stages                                               |
| Theta | Univariate TRF vs. mTRF                          | Greater <i>PredPowers</i> based on mTRFs than on univariate TRFs                                                 |
|       | Congruency                                       | Greater congruent than surrogate <i>PredPowers</i> for speech, but not for non-speech utterances                 |
|       | <i>PredPowers</i> across stimulus types          | Greater <i>PredPowers</i> for speech than for non-speech                                                         |
|       | Classification capacity of mTRFs                 | Better performances for speech than for non-speech                                                               |

---

Temporal property of  
mTRFs ('early' vs. 'later')

---

Greater absolute weighting in early than in later stages

---

665

## 666 **4. Discussions**

### 667 **4.1 Superiority of mTRFs to univariate TRFs**

668 We used a multivariate linear transformation algorithm that quantifies the neural  
669 entrainment of speech envelopes in EEGs (Di Liberto et al., 2015; Crosse et al., 2016). We  
670 showed that both delta- and theta-band *PredPowers* were significantly greater based on the  
671 mTRF than on the univariate TRF model. This is consistent with Di Liberto et al. (2015) which  
672 showed superiority of mTRF to univariate TRF when studying the low-frequency (1 ~ 15 Hz)  
673 neural entrainment of acoustic envelopes during speech perception. This indicates that low-  
674 frequency (both delta and theta) neural entrainment is achieved in a way that the brain encodes  
675 envelopes at multiple narrowbands at the cochlear output, rather than encodes the single  
676 broadband envelopes. While most previous MEG/EEG studies investigated the role of neural  
677 entrainment to single broadband acoustic envelopes for speech intelligibility (e.g., Peelle et al.,  
678 2013; Doelling et al., 2014; Vander Ghinst et al., 2016; Molinaro and Lizarazu, 2018;  
679 Vanthornhout et al., 2018), we suggest that the mTRF model provides a more appropriate  
680 approach of quantifying neural entrainment of acoustic envelopes during speech perception.

681 Note that, however, despite the superiority, a potential drawback of the mTRF model is that  
682 the linear mapping between envelopes and EEGs could be insensitive to the characteristics of  
683 response nonlinearities in audition (e.g., Christianson et al., 2008; Ahrens et al., 2008;  
684 Sadagopan and Wang, 2009). That being said, linear mapping is still a good approximation, as  
685 more advanced non-linear approaches in MEG/EEGs may yield greater computational  
686 complications and only marginal and negligible improvements (see detailed discussions by  
687 Crosse et al., 2016).

### 688 **4.2 Distinctions between delta- and theta-band neural entrainment at different** 689 **linguistic hierarchical levels**

#### 690 **4.2.1 Delta- and theta-band entrainment across stimulus types**

691 Envelope modulations are critical acoustic cues for speech understanding (Drullman et al.,  
692 1994; Shannon et al., 1995; Arai et al., 1999; Swaminathan and Heinz, 2012). Previous MEG  
693 and EEG studies have shown that low-frequency neural entrainment of speech envelopes is  
694 associated with speech intelligibility (Peelle et al., 2013; Doelling et al., 2014; Vanthornhout  
695 et al., 2018). Recent tACS studies further showed that manipulating the degree of neural  
696 entrainment to envelopes can alter speech intelligibility, arguing the causal effect of the  
697 entrainment during speech perception (Zoefel et al., 2017; Riecke et al., 2018; Wilsch et al.,  
698 2018). Despite these findings, it is not clear, however, what is the role of neural entrainment at  
699 different linguistic hierarchical levels. Understanding speech should include processes of  
700 recognizing both phonological and semantic information (Nahum et al., 2008). Simply seen  
701 from the relationship between neural entrainment and speech intelligibility, how the  
702 entrainment subserves phonological and semantic processing during speech perception is still

703 obscure. The present study therefore tested the EEG entrainment to speech envelopes in  
704 response to stimuli of real-word, pseudo-word and backward utterances that were expected to  
705 successfully dissociate the phonological and semantic processing (Binder et al., 2000; Londei  
706 et al., 2010; Saur et al., 2010; Mai et al., 2016). We found that delta-band neural entrainment  
707 (*PredPower*) was significantly greater for pseudo-word than for real-word and backward  
708 utterances. Theta-band neural entrainment, on the other hand, was significantly greater for  
709 speech (real-word and pseudo-word) than for non-speech (backward) utterances, but did not  
710 differ statistically between real-word and pseudo-word.

711 The result thus indicates the different roles that delta- and theta-band entrainment take  
712 during phonological and semantic processing. Greater theta-band entrainment for speech than  
713 for non-speech indicate its role in speech-specific processing, even though it can also occur in  
714 non-speech stimuli (theta-band *PredPower* for backward utterances was also above random  
715 level; see Fig. 4). The speech-specificity was likely to be associated with phonological, but not  
716 higher-level (semantic) processing, as it did not differ between real-word and pseudo-word  
717 utterances. This could indicate the neural tracking of syllabic- and sub-syllabic pattern of the  
718 speech signals during phonological processing. The delta-band entrainment, on the other hand,  
719 showed a distinct pattern, where the speech-specific properties were exhibited for pseudo-word  
720 utterances but not for real-word utterances. Plausibly, this may be explained by interactions  
721 between phonological and semantic processing during tracking of supra-syllabic rhythms, i.e.,  
722 richer semantic information in the real-word utterances assisted in recognition of phonological  
723 contents, thereby reducing the demands of phonological processing indexed by the delta-band  
724 entrainment (Mai et al., 2016). From the perspective of pseudo-word utterances, delta-band  
725 entrainment was stronger possibly because of greater listening effort for phonological  
726 recognition due to lack of assistance from semantic information. This is in line with the  
727 behavioral studies showing the importance of delta-band envelopes for recognition of  
728 semantically meaningless syllables (Arai et al., 1996; 1999). It is also compatible with findings  
729 showing increased delta-band entrainment in some attention-demanding conditions, such as  
730 recognition of speech with reduced spectral resolution (Ding et al., 2014) or with increasingly  
731 noisy backgrounds (Vander Ghinst et al., 2016).

#### 732 4.2.2 Specificity of delta- and theta-band mTRFs for different stimulus types

733 *PredPowers* were compared between the ‘congruent’ and ‘surrogate’ conditions to test the  
734 specificity of mTRFs for different stimulus types. The congruency effect was found for pseudo-  
735 word but not for real-word or backward utterances at the delta band, and for speech but not for  
736 non-speech at the theta-band. Correspondingly, classification capacity of mTRFs were tested  
737 to see how congruent testing trials were accurately identified. Performances of delta-band  
738 mTRFs were better for pseudo-word than for real-word and backward utterances, while  
739 performances of theta-band mTRFs were better for speech than non-speech. Same patterns  
740 were shown in Scenario\_1 and Scenario\_2, although no statistical significance between any  
741 two stimulus types was found at the theta band in Scenario\_1 (Fig. 6 right panel). Lack of  
742 significance here may be because of the inability of theta-band mTRFs to distinguish testing  
743 trials between real-word and pseudo-word utterances, thereby decreasing the classification  
744 accuracies for both real-word and pseudo-word utterances when mTRFs were tested by trials  
745 from all stimulus types. These results are thus consistent with the findings which compared  
746 entrainment between stimulus types, showing the highest specificity of delta-band entrainment  
747 for pseudo-word utterances and higher specificity of theta-band entrainment for speech than  
748 for non-speech.



749 Our results echo the recent MEG study showing that delta- and theta-band entrainment play  
750 different roles during speech perception (Molinaro and Lizarazu, 2018). Despite this, however,  
751 the roles of delta- and theta-band entrainment found in the present study were different from  
752 those in Molinaro and Lizarazu (2018). Molinaro and Lizarazu (2018) compared neural  
753 entrainment between speech and non-speech (2-Hz and 7-Hz AM white-noise, or spectrally-  
754 rotated speech). They found that, delta-band entrainment was greater for speech than for non-  
755 speech in the right superior temporal and left inferior frontal regions, while theta-band  
756 entrainment did not differ between speech and non-speech. It was therefore argued that delta-  
757 entrainment involves higher-order computations for language processing, while theta-  
758 entrainment involves perceptual processing of auditory inputs (Molinaro and Lizarazu, 2018).  
759 In contrast, our current results showed that greater delta-band entrainment for speech than for  
760 non-speech occurs only when semantic information are deficient (pseudo-word), while theta-  
761 band entrainment is greater for speech than non-speech regardless of the semantic contents.

762 There could be several reasons for the distinctions between our results and the findings by  
763 Molinaro and Lizarazu (2018). First, the non-speech stimuli used in Molinaro and Lizarazu  
764 (2018) were AM white-noise and spectrally-rotated speech with the same RMS intensity as the  
765 speech stimuli. In this case, due to huge differences of spectral distributions between speech  
766 and non-speech, perceptual loudness across spectral bands was not controlled. It may worth  
767 pondering whether such uncontrolled factor could influence the differences of neural  
768 entrainment between speech and non-speech. Our present study, on the other hand, used  
769 backward utterances as non-speech stimuli which kept the long-term spectrum the same as  
770 speech, thereby controlling the perceptual loudness across spectral bands. Second, in our  
771 present study, we used Mandarin utterances with the syllable rate controlled at ~ 4 Hz for all  
772 trials (see *Methods*), while it is not clear whether the syllable rate of the Spanish utterances was  
773 relatively fixed or varied across trials in Molinaro and Lizarazu (2018). We argue that the effect  
774 of neural entrainment at frequencies in the neighbourhood of the syllable rate (i.e., theta band)  
775 could be enhanced as a consequence of fixing the syllable rate across stimuli. This may be a  
776 possible reason for a stronger effect of theta-band entrainment in our present study. Third,  
777 different methods of quantifying neural entrainment were used. Molinaro and Lizarazu (2018)  
778 measured cross-spectral density between MEG signals and the broadband speech envelopes.  
779 The present study used linear transformation algorithms that involve training and testing  
780 mTRFs that reflect the extent of mapping between EEGs and speech envelopes from multiple  
781 spectral bands (Di Liberto et al., 2015; Crosse et al., 2016). Future work would be needed to  
782 clarify whether results obtained from different methods are comparable and consistent.

### 783 **4.3 Different temporal properties between delta- and theta-band mTRFs**

784 TRF can be seen as a fitting filter, through which acoustic features project to corresponding  
785 neural signals (Ding and Simon, 2012). TRFs can thus reflect the characteristics of how speech  
786 envelope information were encoded in the brain. Distinctions of temporal properties between  
787 delta- and theta-band mTRFs were found. Delta-band mTRFs showed persistent temporal  
788 fluctuations up to at least 300 ms, while early N1-P1-N2-like complexes were shown in theta-  
789 band mTRFs followed by gradual attenuations. Statistically, the absolute weighting of theta-  
790 but not delta-band, mTRFs were greater at early (20 ~ 160 ms) than at later time lags (160 ~  
791 300 ms). It is likely that delta-band entrainment occurs not merely at early sensory processing  
792 stages, but also sustains during higher-order neural processing that take place later in time.  
793 Theta-band entrainment, on the other hand, has statistically higher probability to occur at early  
794 processing stages. Such properties are in line with the current finding that delta-, but not theta-  
795 band entrainment was affected by higher-level linguistic (semantic) information. This is also

796 compatible with [Molinaro and Lizarazu \(2018\)](#) which argued that theta-band entrainment  
797 mainly reflects perceptual processing and delta-band entrainment involves additional higher-  
798 order processing during speech perception. In addition, similar to *PredPowers*, topographies  
799 of mTRFs showed dominant distributions over centro-frontal regions (**Fig. 9**), consistent with  
800 the previous finding ([Crosse et al., 2015](#)). Although source localization was not conducted due  
801 to extremely limited spatial resolution (32 electrodes), the relevant neural processing stages  
802 may involve a temporal-frontal cortical network during speech processing ([Park et al., 2015](#);  
803 [Molinaro and Lizarazu, 2018](#)).

#### 804 **4.4 Possible effects of the behavioral tasks**

805 Neural entrainment was tested when participants performed a forced-choice sound-  
806 matching task (see *Methods*). Such task may force participants to focus their attention on lower-  
807 level linguistic processing like phonological recognition. Previous studies have shown that  
808 behavioral tasks at different levels could alter the neural oscillatory activities. For example,  
809 [Shahin et al. \(2009\)](#) showed that EEG powers at theta to gamma bands were different between  
810 tasks of gender voice detection and semantic discrimination when participants listened to  
811 auditory words. [McNab et al. \(2012\)](#) showed that MEG powers at beta and gamma bands were  
812 modulated by tasks of phonological and semantic recognition in response to visual words. It is  
813 not clear whether neural entrainment is modulated by different behavioral tasks, which may  
814 needs to be studied further in the future.

#### 815 **4.5 Summary**

816 The present study investigated the distinctions between delta- and theta-band neural  
817 entrainment of speech envelopes at different linguistic hierarchical levels, using auditory  
818 stimuli that dissociated phonological and semantic contents. Neural entrainment was measured  
819 using the mTRF model that mapped speech envelopes at multiple spectral bands onto EEGs.  
820 We demonstrated that theta-band entrainment was modulated by phonological, but not  
821 semantic contents, indicating its role of tracking syllabic and sub-syllabic patterns for  
822 phonological processing. Delta-band entrainment, on the other hand, was greater with rich  
823 phonological but deficient semantic information (pseudo-word). This may reflect the  
824 mechanism of interactions between phonological and semantic processing during tracking of  
825 supra-syllabic rhythms, i.e., reduced demands for phonological recognition in real-word  
826 utterances, or greater listening effort in pseudo-word utterances. Furthermore, through  
827 analysing temporal properties of mTRFs, we demonstrated that, delta-band entrainment  
828 sustained across neural processing stages up to ~ 300 ms, while theta-band entrainment is more  
829 likely to occur at early stages (< 160 ms).

830 Taken together, we confirmed our hypothesis that delta- and theta-band entrainment take  
831 distinct roles at different linguistic hierarchical levels. We suggest the results could improve  
832 our understanding and new insights into the mechanisms of neural encoding of acoustic  
833 features during speech perception in general. Further studies may be needed to clarify how  
834 different quantification methods and experimental tasks modulate the effect of neural  
835 entrainment.

836

837

## 838 Acknowledgements

839 This study was supported in part by grant 455911 of the Hong Kong RGC to Prof. William  
840 S.-Y. Wang at The Chinese University of Hong Kong. Guangting Mai acknowledges support  
841 from the UCL Graduate Cross-Disciplinary Training Scholarship based at Departments of  
842 Experimental Psychology and Medical Physics & Biomedical Engineering.

843

## 844 References

845 Ahissar, E., Nagarajan, S., Ahissar, M., Protopapas, A., Mahncke, H., & Merzenich, M. M.  
846 (2001). Speech comprehension is correlated with temporal response patterns recorded  
847 from auditory cortex. *Proceedings of the National Academy of Sciences*, 98(23), 13367-  
848 13372.

849 Ahrens, M. B., Linden, J. F., & Sahani, M. (2008). Nonlinearities and contextual influences in  
850 auditory cortical responses modeled with multilinear spectrotemporal methods. *Journal of*  
851 *Neuroscience*, 28(8), 1929-1942.

852 Arai, T., Pavel, M., Hermansky, H., & Avendano, C. (1996). Intelligibility of speech with  
853 filtered time trajectories of spectral envelopes. In *Proceedings of ICSLP 96, Fourth*  
854 *International Conference on Spoken Language Processing, IEEE*. 2490-2493.

855 Arai, T., Pavel, M., Hermansky, H., & Avendano, C. (1999). Syllable intelligibility for  
856 temporally filtered LPC cepstral trajectories. *The Journal of the Acoustical Society of*  
857 *America*, 105(5), 2783-2791.

858 Benoit, C., Grice, M., & Hazan, V. (1996). The SUS test: A method for the assessment of text-  
859 to-speech synthesis intelligibility using Semantically Unpredictable Sentences. *Speech*  
860 *Communication*, 18(4), 381-392.

861 Binder, J. R., Frost, J. A., Hammeke, T. A., Bellgowan, P. S., Springer, J. A., Kaufman, J. N.,  
862 & Possing, E. T. (2000). Human temporal lobe activation by speech and nonspeech  
863 sounds. *Cerebral Cortex*, 10(5), 512-528.

864 Bourguignon, M., De Tieghe, X., De Beeck, M. O., Ligot, N., Paquier, P., Van Bogaert, P.,  
865 Goldman, S., Hari, R., & Jousmäki, V. (2013). The pace of prosodic phrasing couples the  
866 listener's cortex to the reader's voice. *Human Brain Mapping*, 34(2), 314-326.

867 Christianson, G. B., Sahani, M., & Linden, J. F. (2008). The consequences of response  
868 nonlinearities for interpretation of spectrotemporal receptive fields. *Journal of*  
869 *Neuroscience*, 28(2), 446-455.

870 Crosse, M. J., Butler, J. S., & Lalor, E. C. (2015). Congruent visual speech enhances cortical  
871 entrainment to continuous auditory speech in noise-free conditions. *Journal of*  
872 *Neuroscience*, 35(42), 14195-14204.

873 Crosse, M. J., Di Liberto, G. M., Bednar, A., & Lalor, E. C. (2016). The multivariate temporal  
874 response function (mTRF) toolbox: a MATLAB toolbox for relating neural signals to  
875 continuous stimuli. *Frontiers in Human Neuroscience*, 10, 604.

- 876 Crouzet, O., & Ainsworth, W. A. (2001, September). On the various influences of envelope  
877 information on the perception of speech in adverse conditions: An analysis of between-  
878 channel envelope correlation. In *Workshop on consistent and reliable acoustic cues for*  
879 *sound analysis*.
- 880 Di Liberto, G. M., O'Sullivan, J. A., & Lalor, E. C. (2015). Low-frequency cortical entrainment  
881 to speech reflects phoneme-level processing. *Current Biology*, 25(19), 2457-2465.
- 882 Ding, N., Chatterjee, M., & Simon, J. Z. (2014). Robust cortical entrainment to the speech  
883 envelope relies on the spectro-temporal fine structure. *NeuroImage*, 88, 41-46.
- 884 Ding, N., & Simon, J. Z. (2012). Neural coding of continuous speech in auditory cortex during  
885 monaural and dichotic listening. *Journal of Neurophysiology*, 107(1), 78-89.
- 886 Ding, N., & Simon, J. Z. (2014). Cortical entrainment to continuous speech: functional roles  
887 and interpretations. *Frontiers in Human Neuroscience*, 8, 311.
- 888 Doelling, K. B., Arnal, L. H., Ghitza, O., & Poeppel, D. (2014). Acoustic landmarks drive  
889 delta-theta oscillations to enable speech comprehension by facilitating perceptual parsing.  
890 *NeuroImage*, 85, 761-768.
- 891 Drullman, R., Festen, J. M., & Plomp, R. (1994). Effect of temporal envelope smearing on  
892 speech reception. *The Journal of the Acoustical Society of America*, 95(2), 1053-1064.
- 893 Ghitza, O. (2017). Acoustic-driven delta rhythms as prosodic markers. *Language, Cognition*  
894 *and Neuroscience*, 32(5), 545-561.
- 895 Giraud, A. L., & Poeppel, D. (2012). Cortical oscillations and speech processing: emerging  
896 computational principles and operations. *Nature Neuroscience*, 15(4), 511.
- 897 Gross, J., Hoogenboom, N., Thut, G., Schyns, P., Panzeri, S., Belin, P., & Garrod, S. (2013).  
898 Speech rhythms and multiplexed oscillatory sensory coding in the human brain. *PLoS*  
899 *Biology*, 11(12), e1001752.
- 900 Londei, A., D'ausilio, A., Basso, D., Sestieri, C., Gratta, C. D., Romani, G. L., & Belardinelli,  
901 M. O. (2010). Sensory-motor brain network connectivity for speech comprehension.  
902 *Human Brain Mapping*, 31(4), 567-580.
- 903 Mai, G., Minett, J. W., & Wang, W. S. Y. (2016). Delta, theta, beta, and gamma brain  
904 oscillations index levels of auditory sentence processing. *NeuroImage*, 133, 516-528.
- 905 McNab, F., Hillebrand, A., Swithenby, S., & Rippon, G. (2012). Combining temporal and  
906 spectral information with spatial mapping to identify differences between phonological  
907 and semantic networks: a magnetoencephalographic approach. *Frontiers in Psychology*,  
908 3, 273.
- 909 Molinaro, N., & Lizarazu, M. (2018). Delta (but not theta)-band cortical entrainment involves  
910 speech-specific processing. *European Journal of Neuroscience*. doi.10.1111/ejn.13811.
- 911 Nahum, M., Nelken, I., & Ahissar, M. (2008). Low-level information and high-level  
912 perception: the case of speech in noise. *PLoS Biology*, 6(5), e126.

- 913 Oldfield, R. C. (1971). The assessment and analysis of handedness: the Edinburgh inventory.  
914 *Neuropsychologia*, 9(1), 97-113.
- 915 Park, H., Ince, R. A., Schyns, P. G., Thut, G., & Gross, J. (2015). Frontal top-down signals  
916 increase coupling of auditory low-frequency oscillations to continuous speech in human  
917 listeners. *Current Biology*, 25(12), 1649-1653.
- 918 Peelle, J. E., Gross, J., & Davis, M. H. (2013). Phase-locked responses to speech in human  
919 auditory cortex are enhanced during comprehension. *Cerebral Cortex*, 23(6), 1378-1387.
- 920 Peña, M., & Melloni, L. (2012). Brain oscillations during spoken sentence processing. *Journal*  
921 *of Cognitive Neuroscience*, 24(5), 1149-1164.
- 922 Riecke, L., Formisano, E., Sorger, B., Başkent, D., & Gaudrain, E. (2018). Neural Entrainment  
923 to Speech Modulates Speech Intelligibility. *Current Biology*, 28(2), 161-169.
- 924 Rimol, L. M.I Specht, K., Weis, S., Savoy, R., & Hugdahl, K. (2005). Processing of sub-  
925 syllabic speech units in the posterior temporal lobe: an fMRI study. *NeuroImage*, 26(4),  
926 1059-1067.
- 927 Sadagopan, S., & Wang, X. (2009). Nonlinear spectrotemporal interactions underlying  
928 selectivity for complex sounds in auditory cortex. *Journal of Neuroscience*, 29(36),  
929 11192-11202.
- 930 Saur, D., Schelter, B., Schnell, S., Kratochvil, D., Küpper, H., Kellmeyer, P., Kümmerer, D.,  
931 Klöppel, S., Glauche, V., Lange, R., Mader, W., Feess, D., Timmer, J., & Weiller, C.  
932 (2010). Combining functional and anatomical connectivity reveals brain networks for  
933 auditory language comprehension. *NeuroImage*, 49(4), 3187-3197.
- 934 Shahin, A. J., Picton, T. W., & Miller, L. M. (2009). Brain oscillations during semantic  
935 evaluation of speech. *Brain and Cognition*, 70(3), 259-266.
- 936 Shannon, R. V., Zeng, F. G., Kamath, V., Wygonski, J., & Ekelid, M. (1995). Speech  
937 recognition with primarily temporal cues. *Science*, 270(5234), 303-304.
- 938 Swaminathan, J., & Heinz, M. G. (2012). Psychophysiological analyses demonstrate the  
939 importance of neural envelope coding for speech perception in noise. *Journal of*  
940 *Neuroscience*, 32(5), 1747-1756.
- 941 Vander Ghinst, M., Bourguignon, M., de Beeck, M. O., Wens, V., Marty, B., Hassid, S.,  
942 Choufani, G., Jousmäki, V., Van Bogaert, P., Goldman, S. & De Tiede, X. (2016). Left  
943 superior temporal gyrus is coupled to attended speech in a cocktail-party auditory scene.  
944 *Journal of Neuroscience*, 36(5), 1596-1606.
- 945 Vanthornhout, J., Decruy, L., Wouters, J., Simon, J. Z., & Francart, T. (2018). Speech  
946 intelligibility predicted from neural entrainment of the speech envelope. *bioRxiv*, 246660.
- 947 Wilsch, A., Neuling, T., Obleser, J., & Herrmann, C. S. (2018). Transcranial alternating current  
948 stimulation with speech envelopes modulates speech comprehension. *NeuroImage*, 172,  
949 766-774.

- 950 Xiao, Z., Zhang, J. X., Wang, X., Wu, R., Hu, X., Weng, X., & Tan, L. H. (2005). Differential  
951 activity in left inferior frontal gyrus for pseudowords and real words: An event-related  
952 fMRI study on auditory lexical decision. *Human Brain Mapping*, 25(2), 212-221.
- 953 Xu, L., Thompson, C. S., & Pfingst, B. E. (2005). Relative contributions of spectral and  
954 temporal cues for phoneme recognition. *The Journal of the Acoustical Society of America*,  
955 117(5), 3255-3267.
- 956 Zoefel, B., Archer-Boyd, A., & Davis, M. H. (2018). Phase Entrainment of Brain Oscillations  
957 Causally Modulates Neural Responses to Intelligible Speech. *Current Biology*, 28(3), 401-  
958 408.

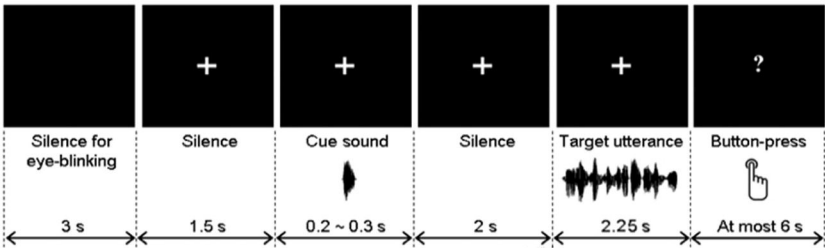

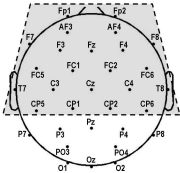



Delta

Univariate TRF  
(‘BROAD’)

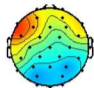

Pseudo-word

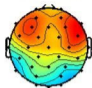

Backward

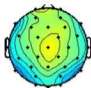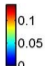

mTRF  
(‘MULTI’)

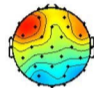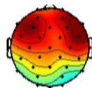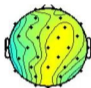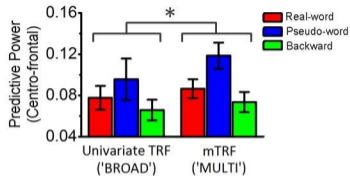

Theta

Univariate TRF  
(‘BROAD’)

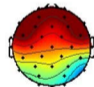

Pseudo-word

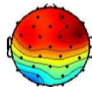

Backward

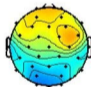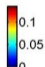

mTRF  
(‘MULTI’)

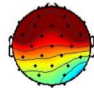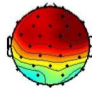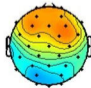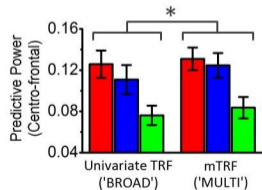

### (A) Real-word

Congruent Surrogate

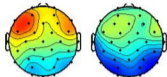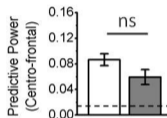

### (B) Pseudo-word

Congruent Surrogate

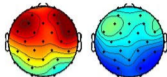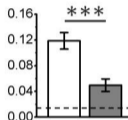

### (C) Backward

Congruent Surrogate

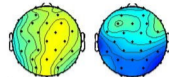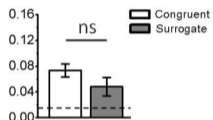

Delta

Congruent Surrogate

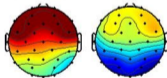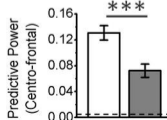

Congruent Surrogate

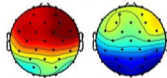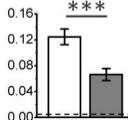

Congruent Surrogate

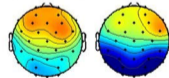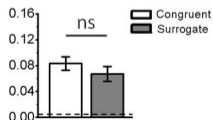

Theta

Real-word Pseudo-word Backward

Delta

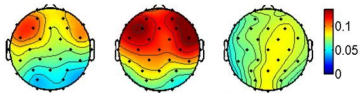

Theta

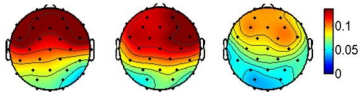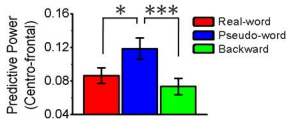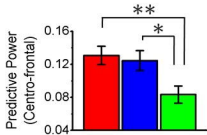

## Delta

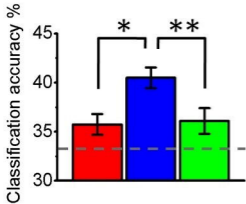

## Theta

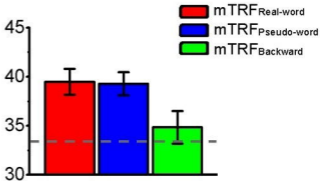

Real-word vs.  
pseudo-word

Real-word vs.  
backward

Pseudo-word vs.  
backward

Delta

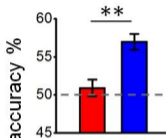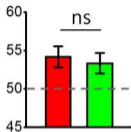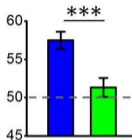

■ mTRF<sub>Real-word</sub>  
■ mTRF<sub>Pseudo-word</sub>  
■ mTRF<sub>Backward</sub>

Theta

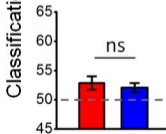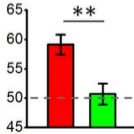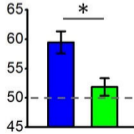

Delta

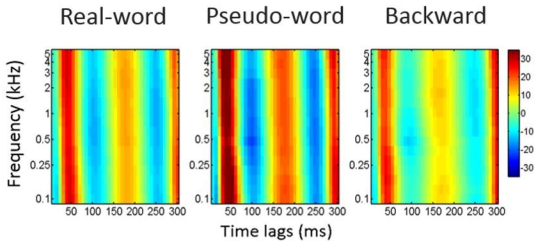

Theta

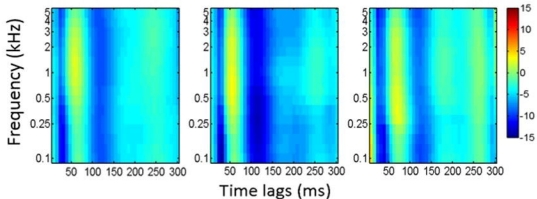

Delta

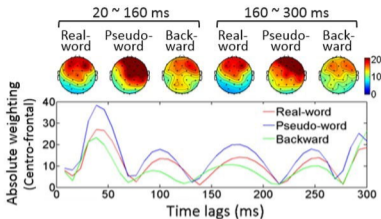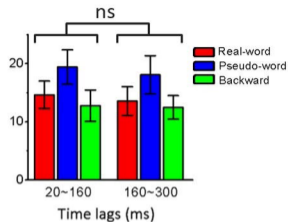

Theta

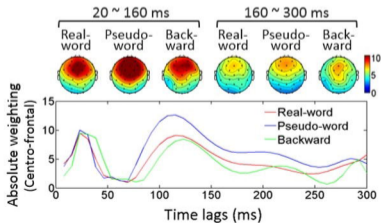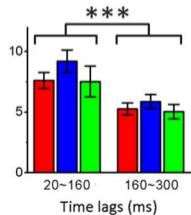

Source: http://biorxiv.org/content/10.1101/556837v1.full.pdf
